# Supplementary material
Source: publisher figshare collection journal article supplement (https://diabetesjournals.figshare.com/articles/dataset/_/24018906)

# Supplementary Fig. 1

A

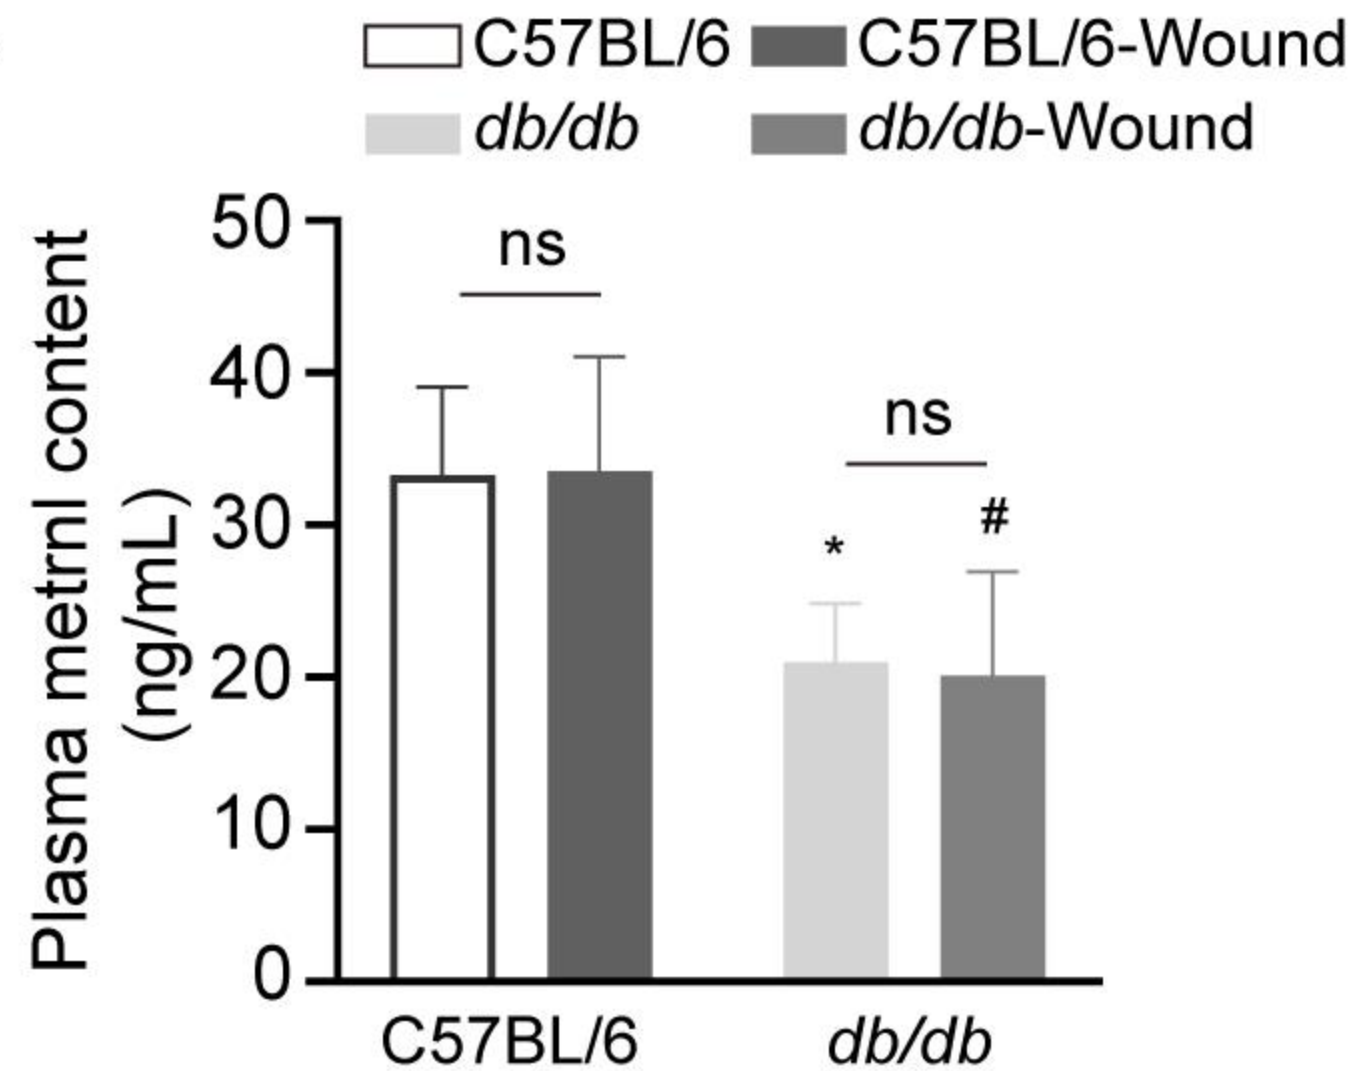

B

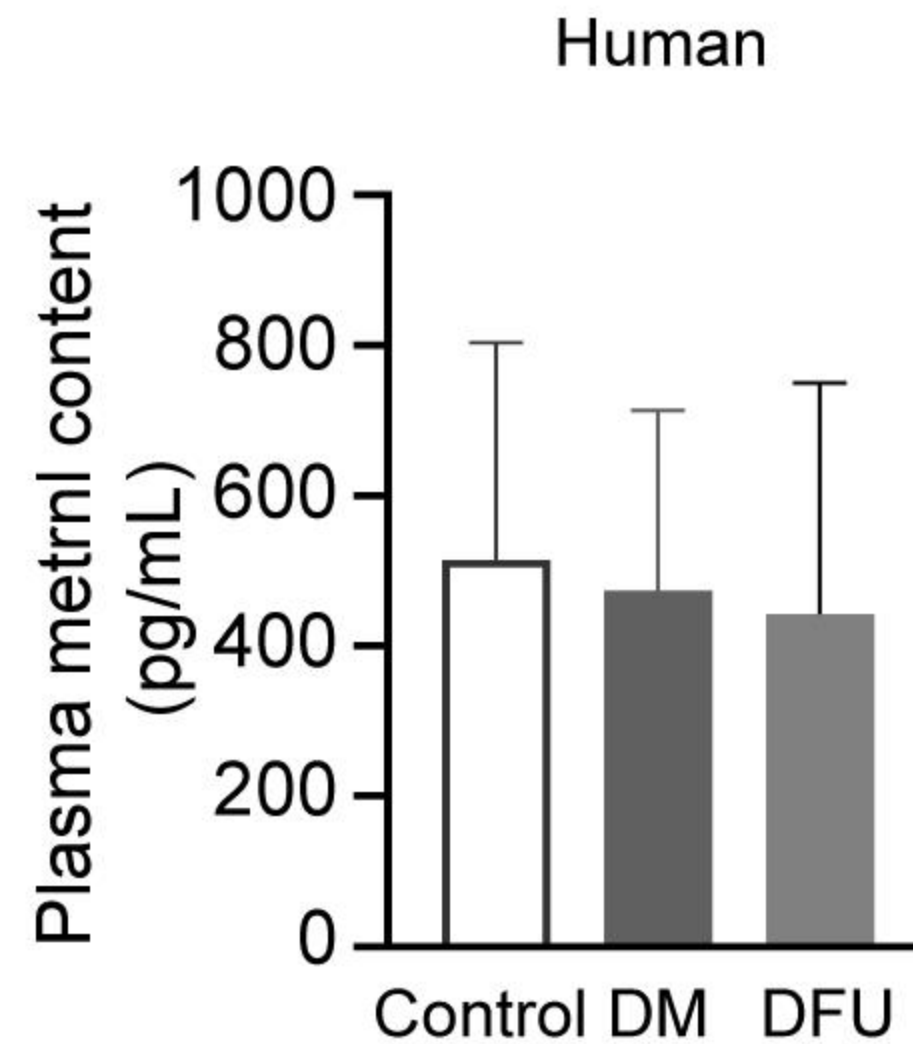

# Supplementary Fig. 2

A

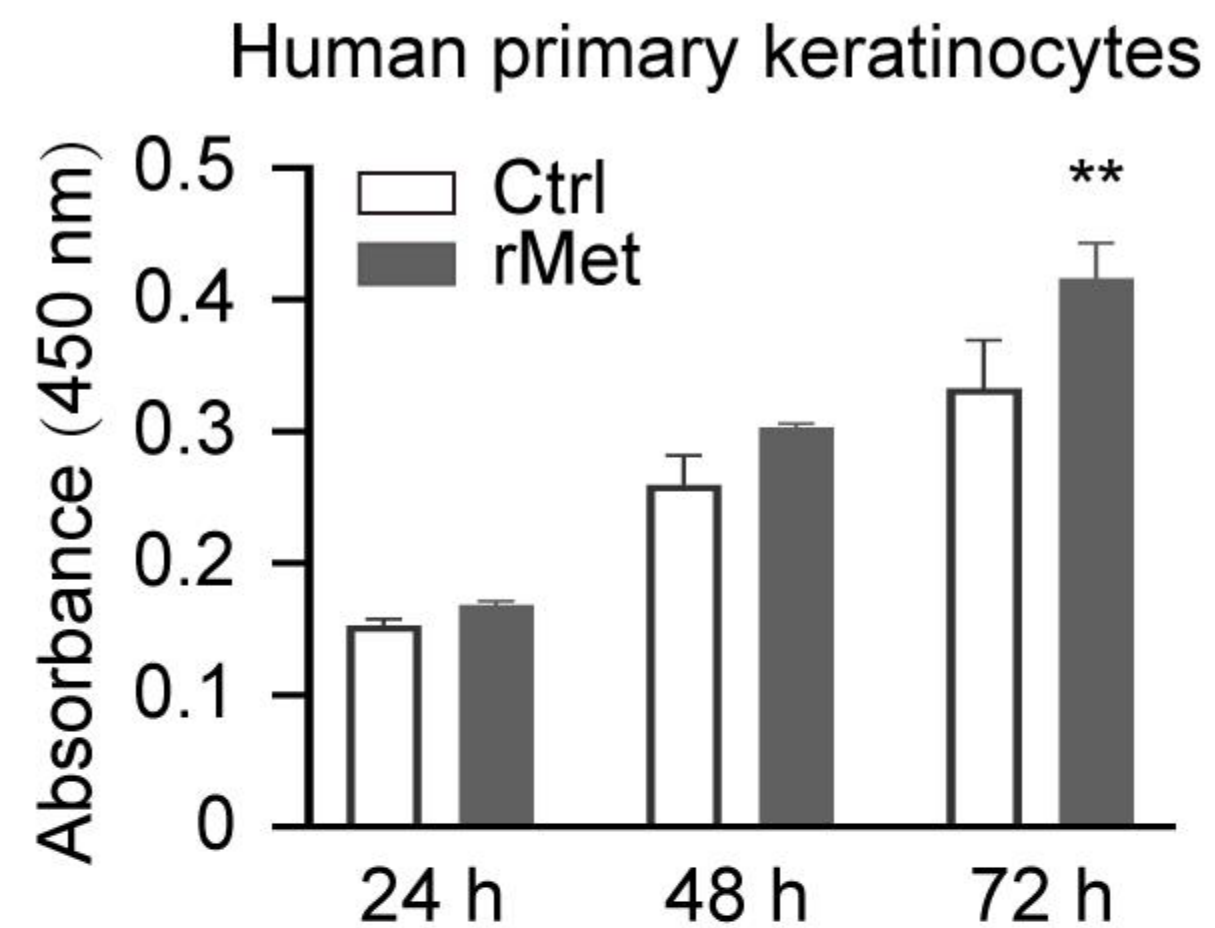

B

Human primary keratinocytes

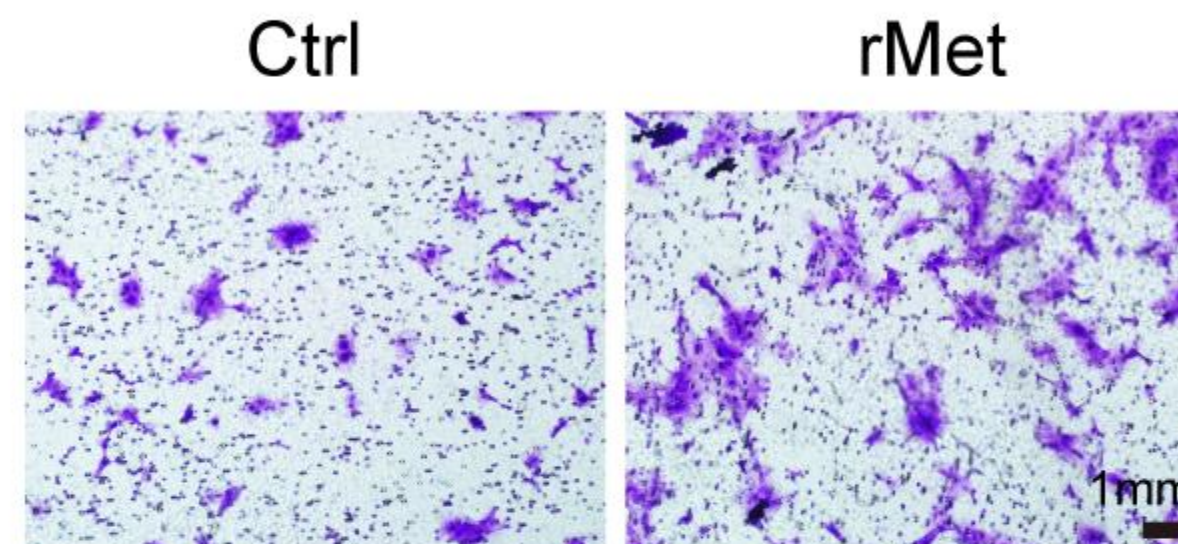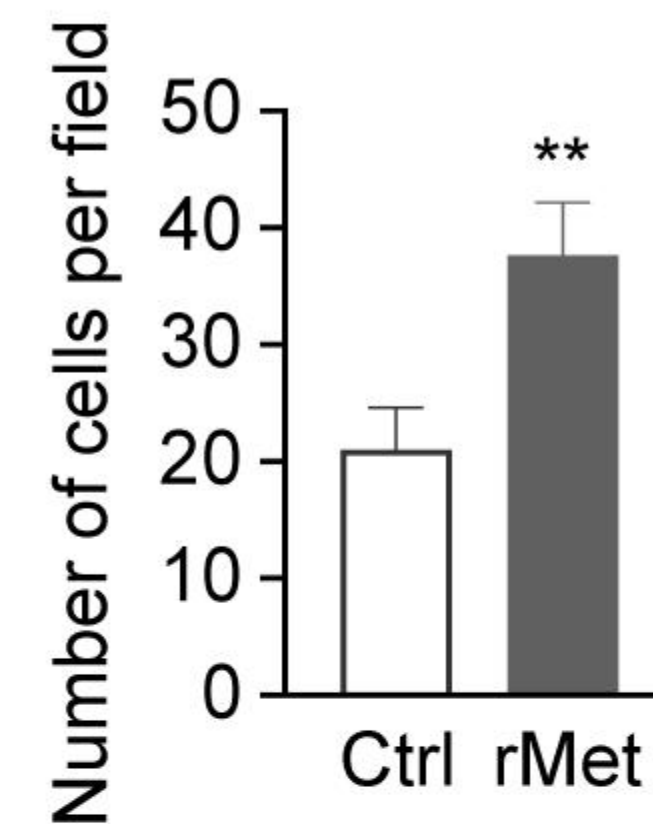

C

Human primary HUVECs

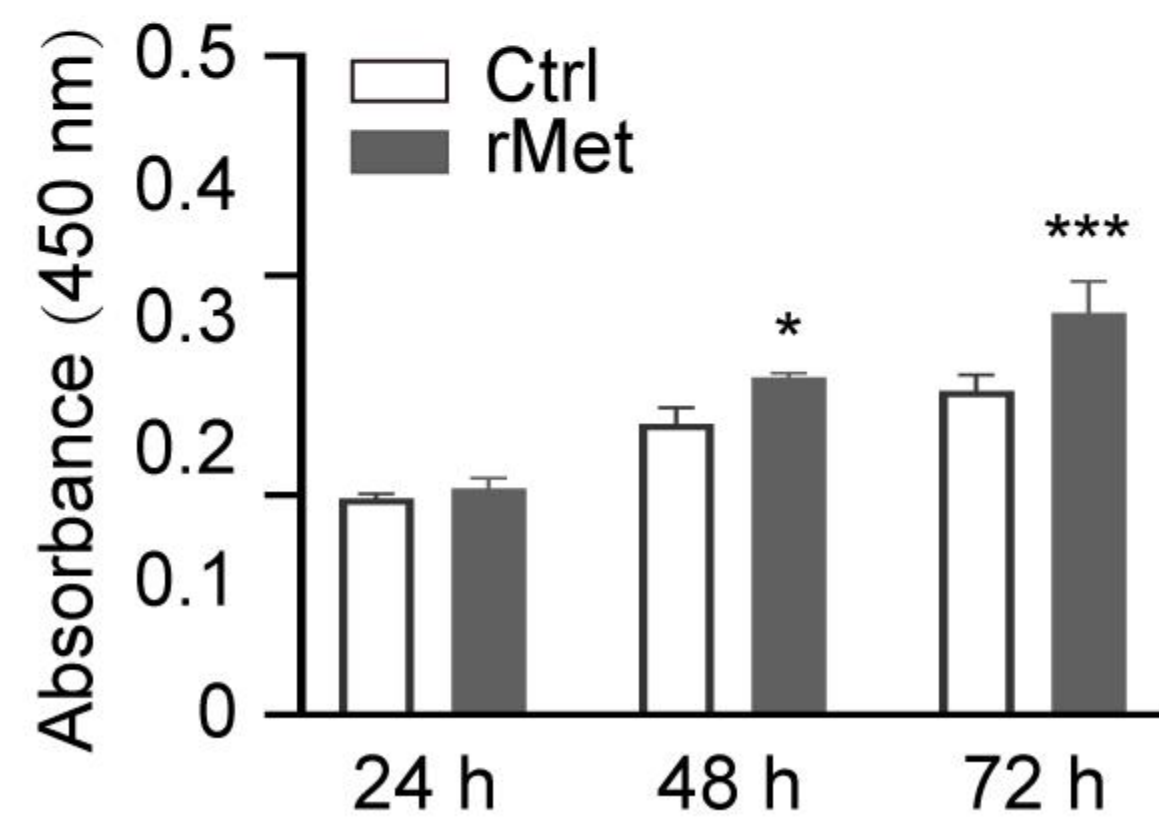

D

Human primary HUVECs

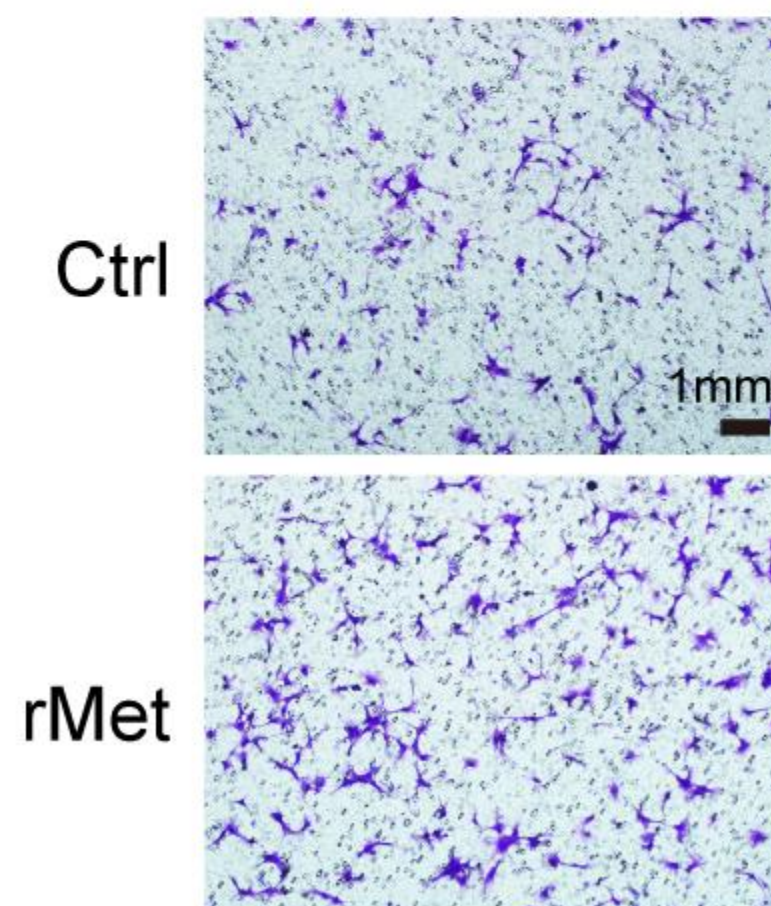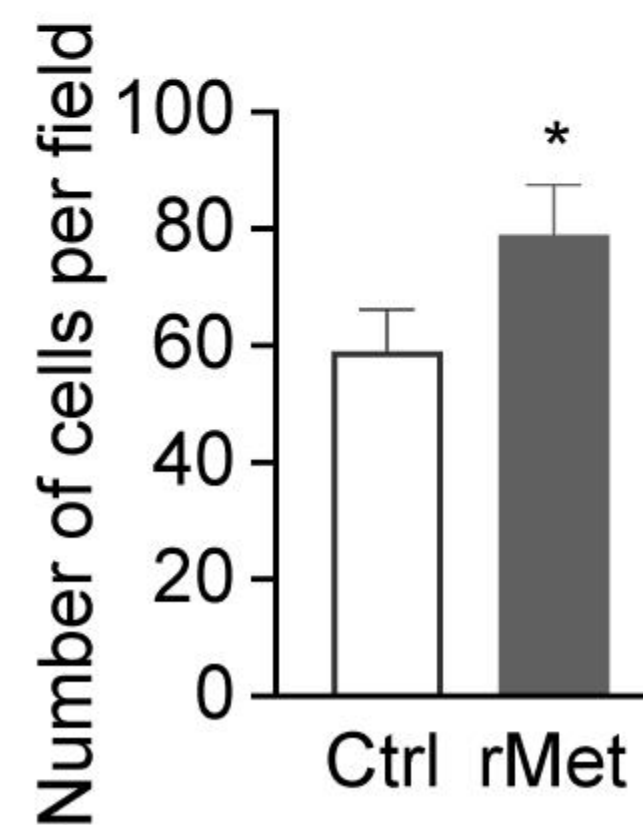

E

Human primary HUVECs

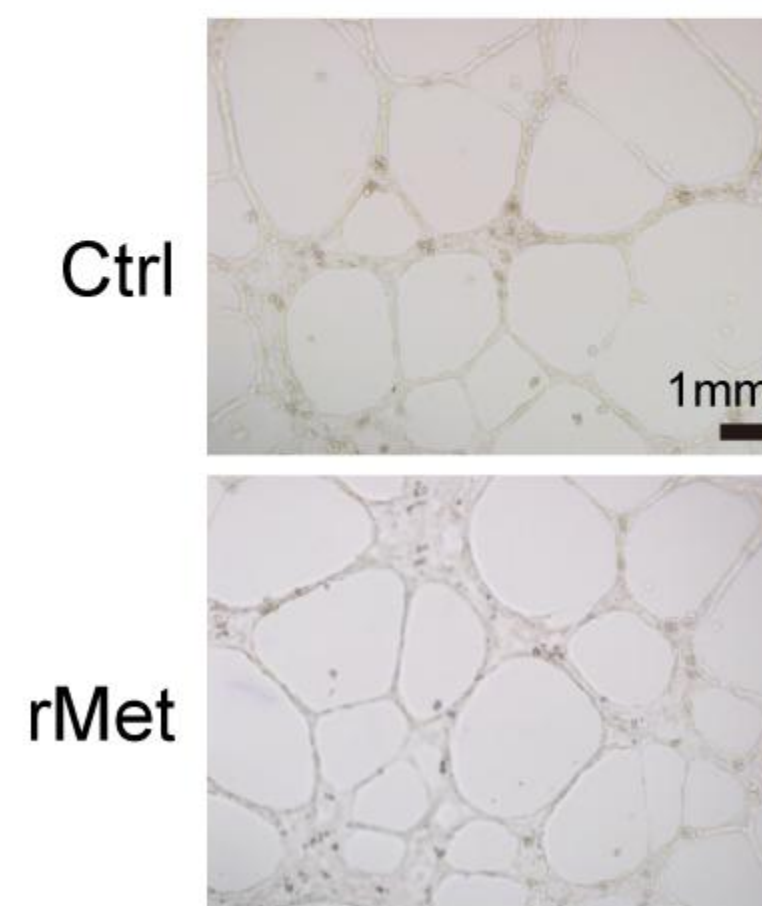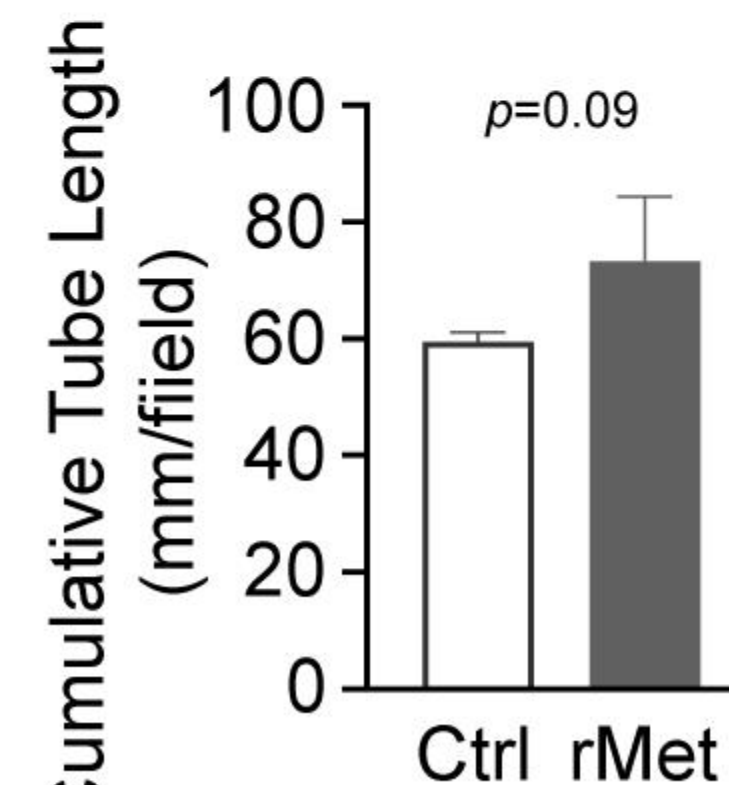



# Supplementary Fig. 3

A

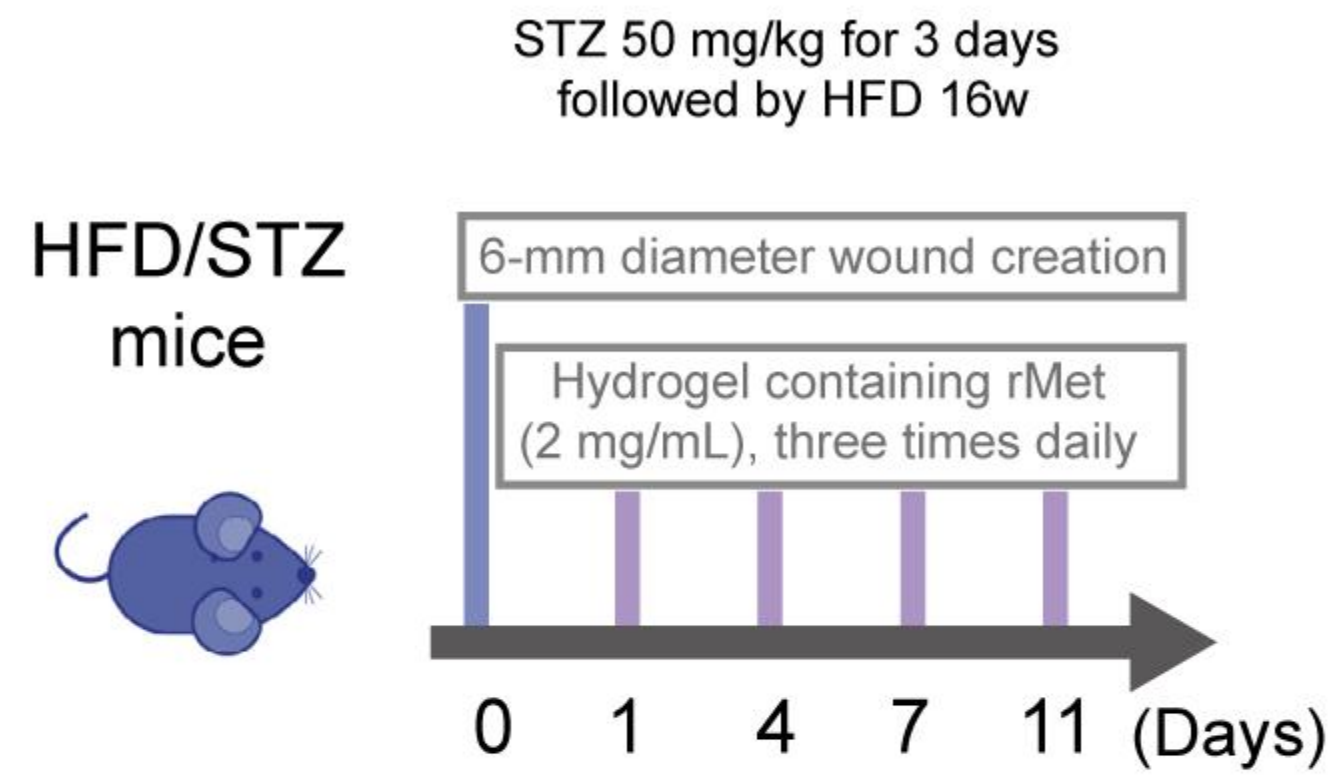

B

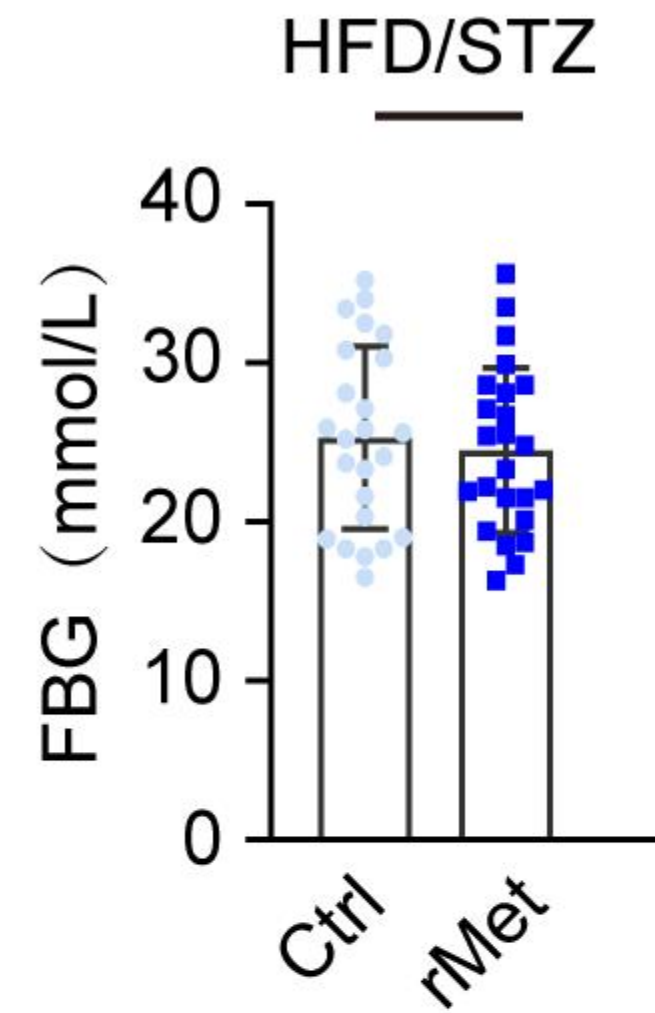

D

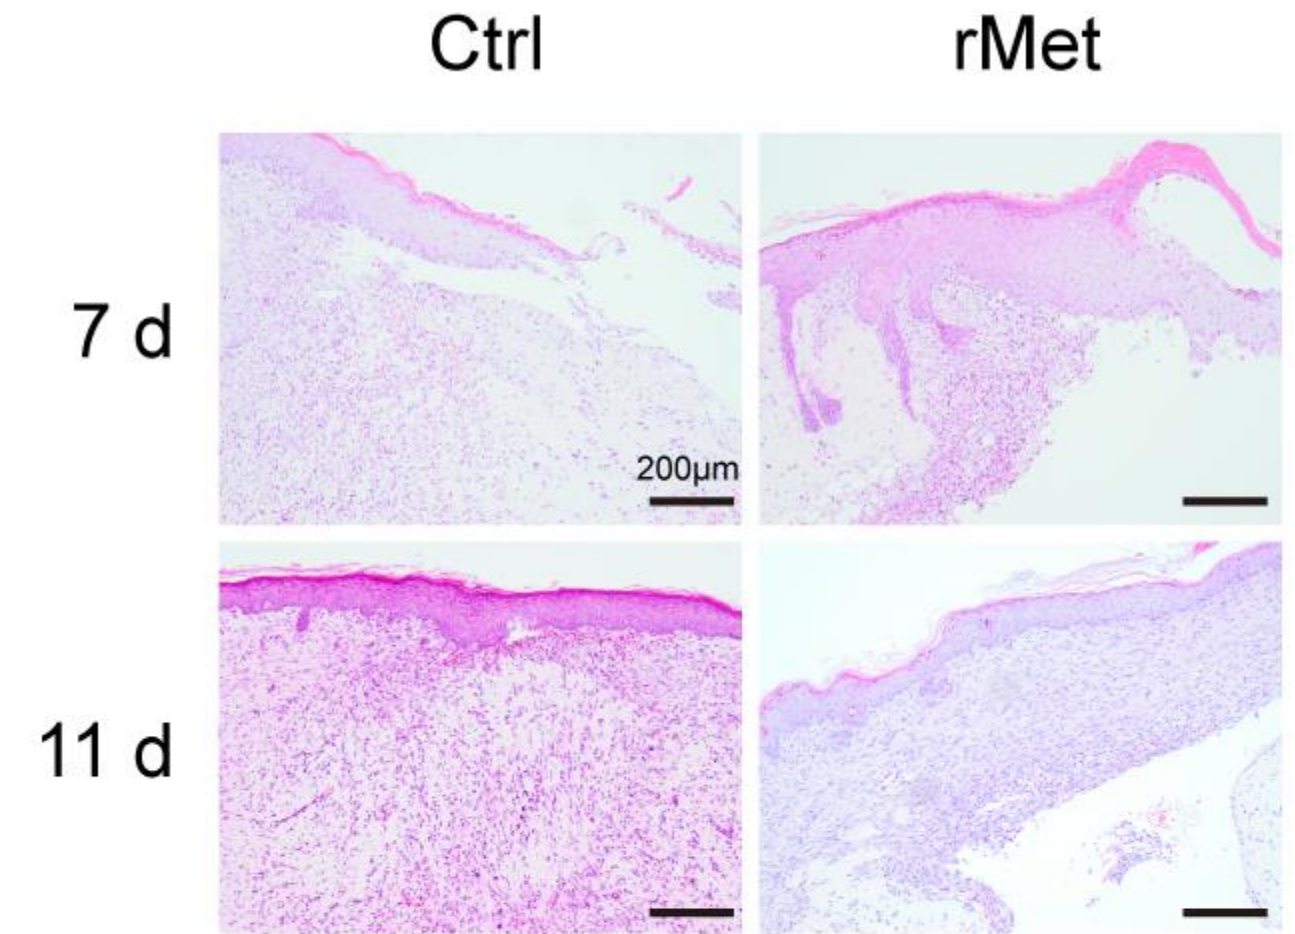

C

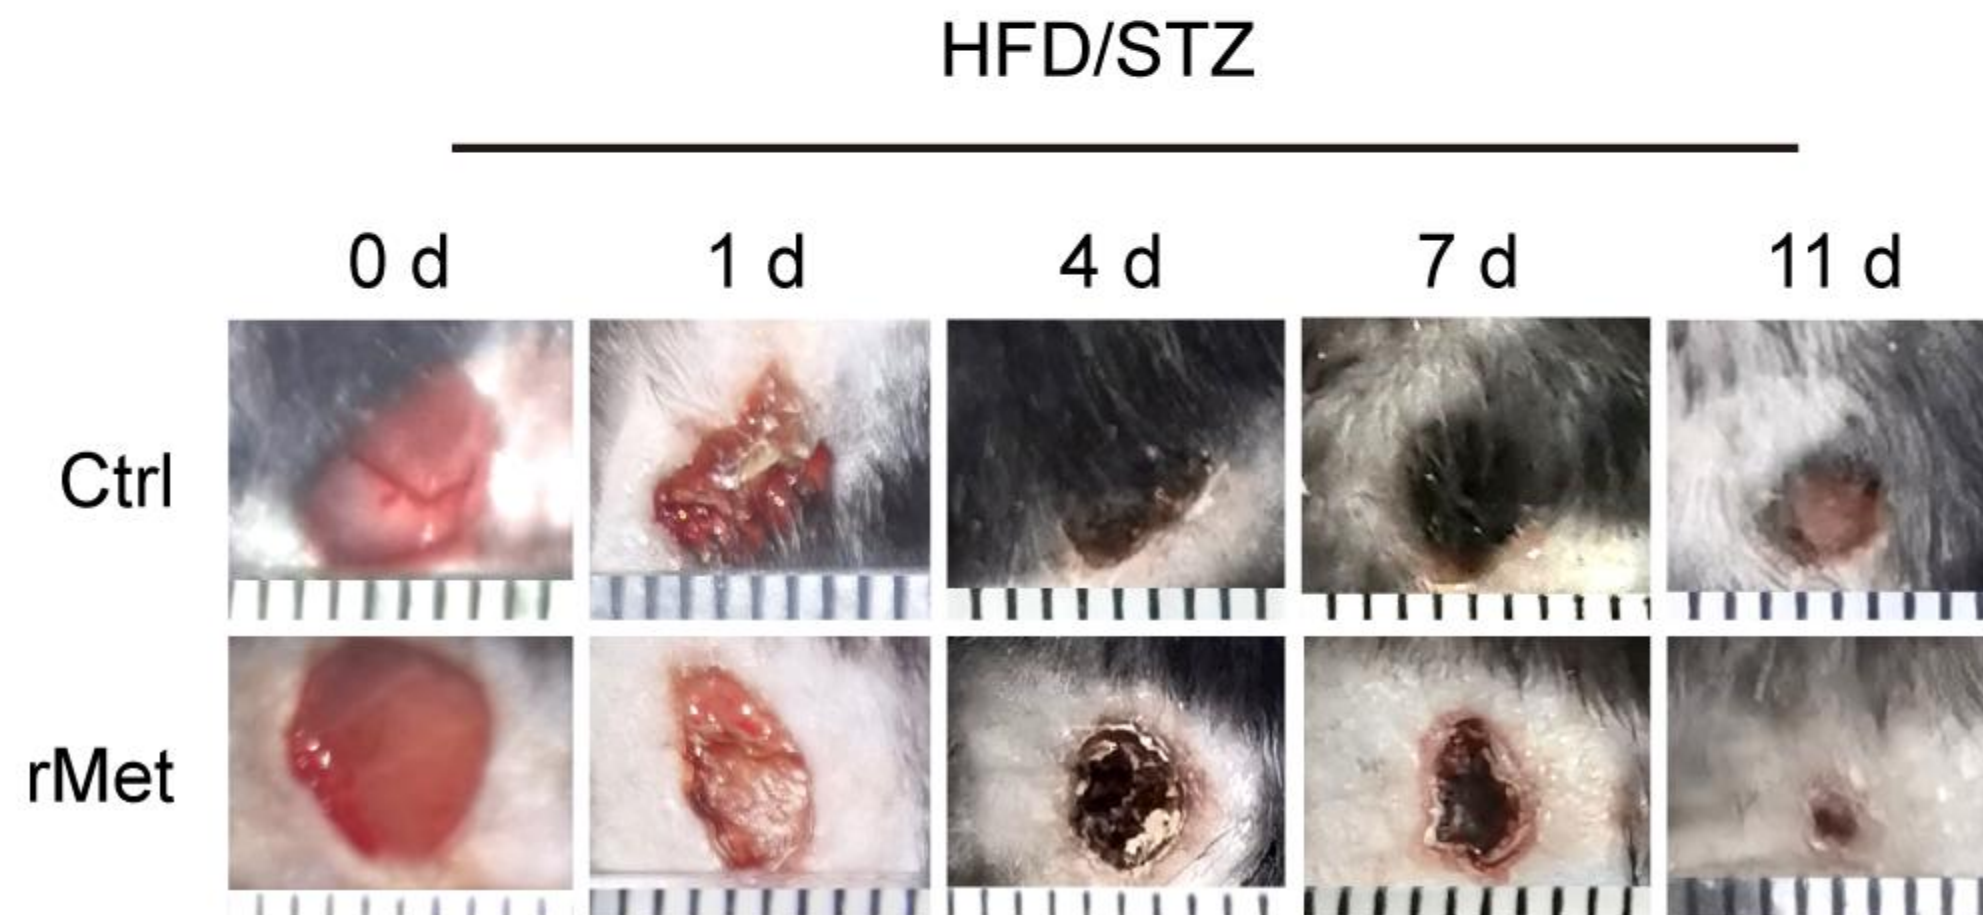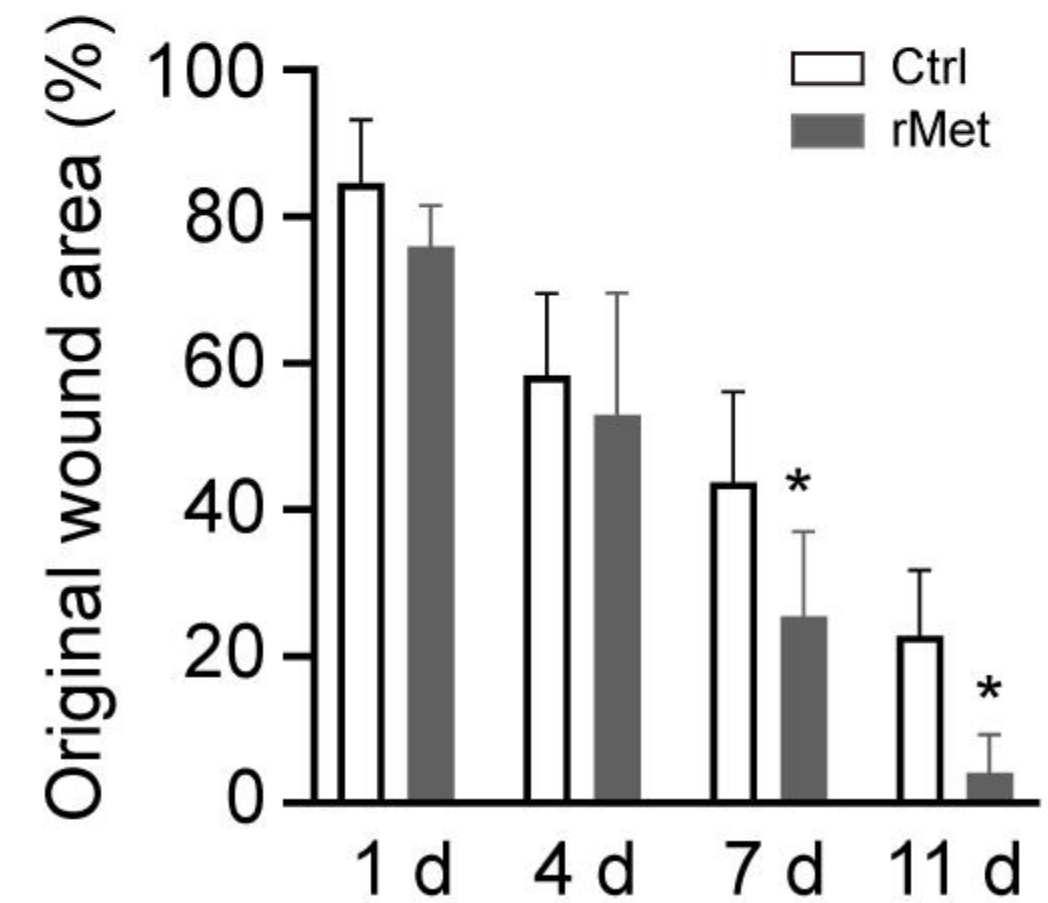



# Supplementary Fig. 4

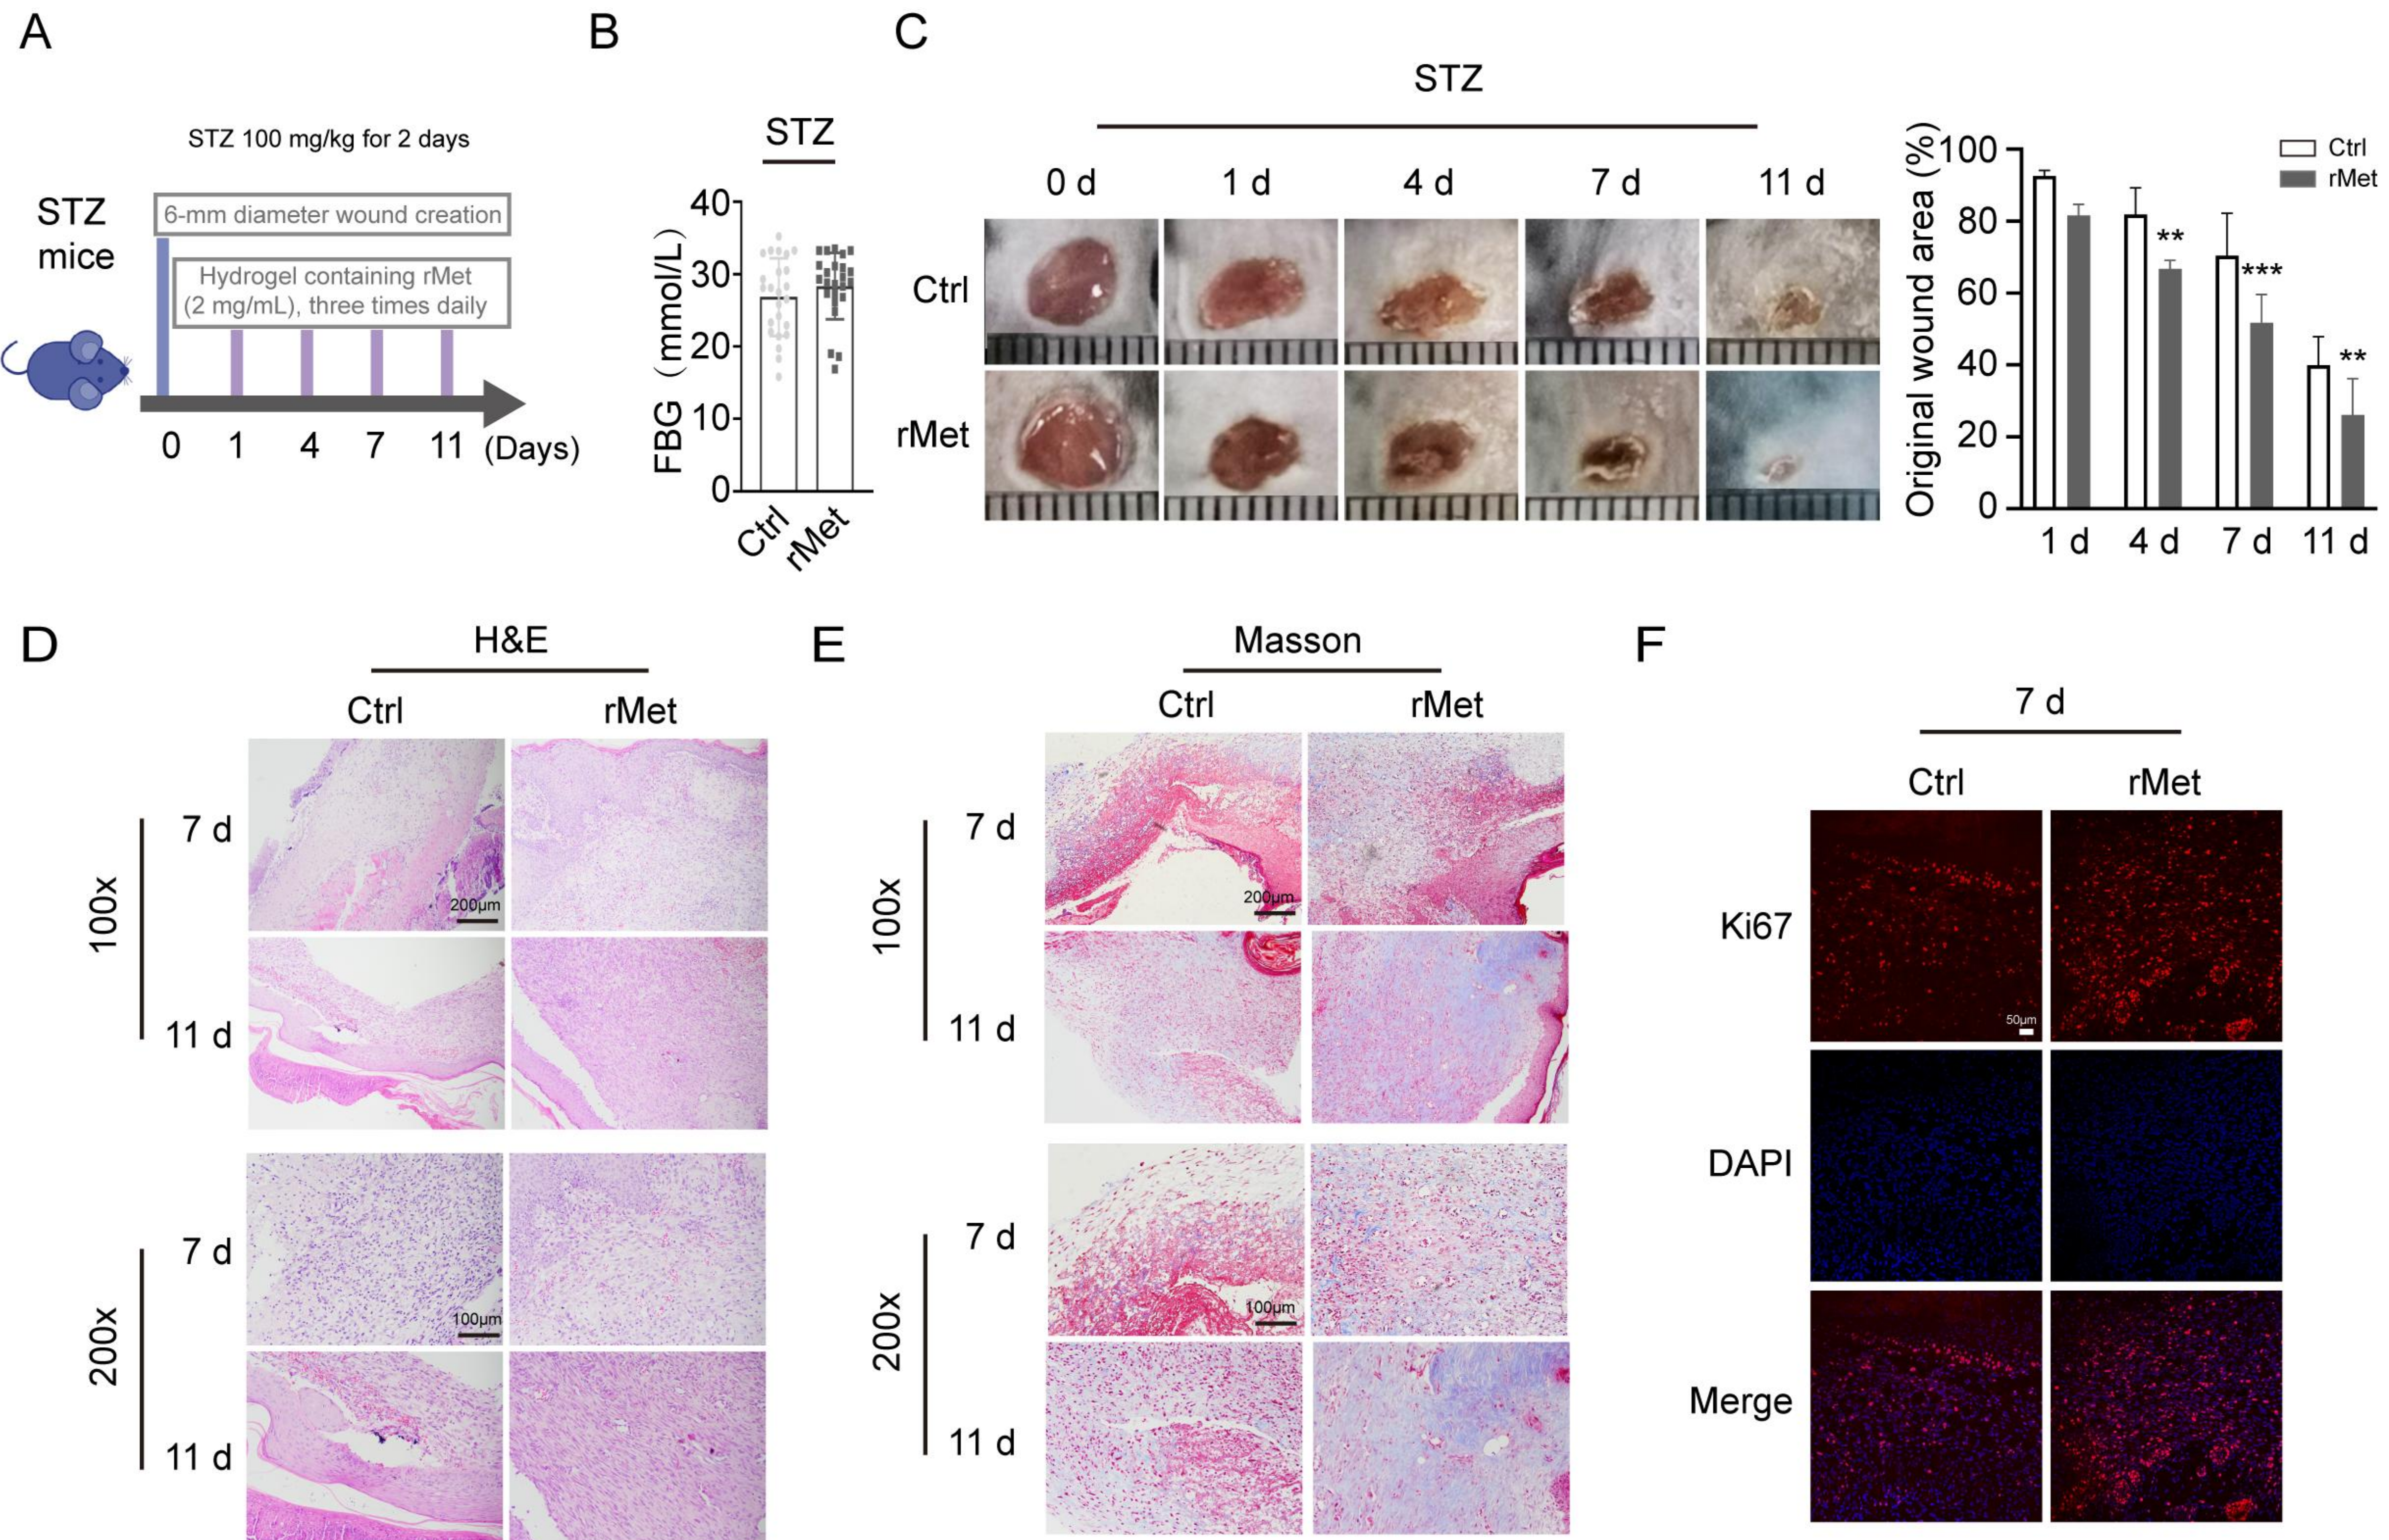



**Supplementary Fig. 5**

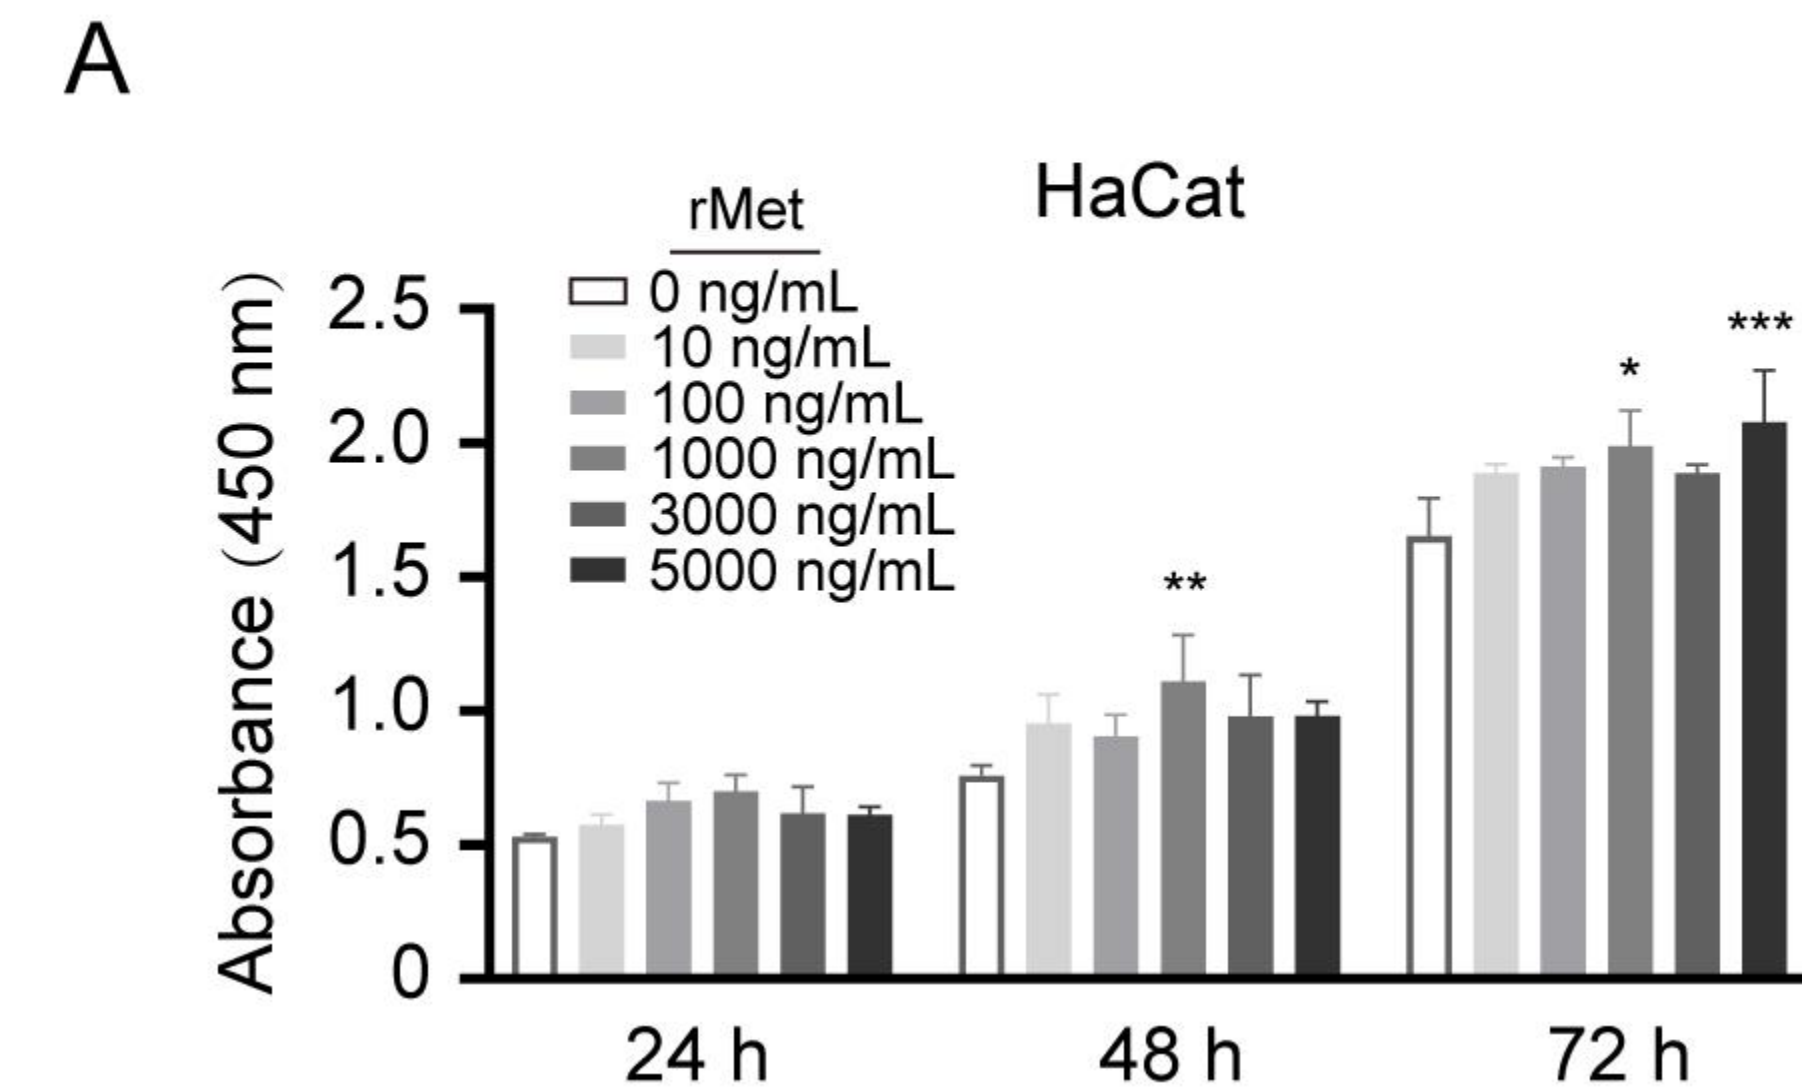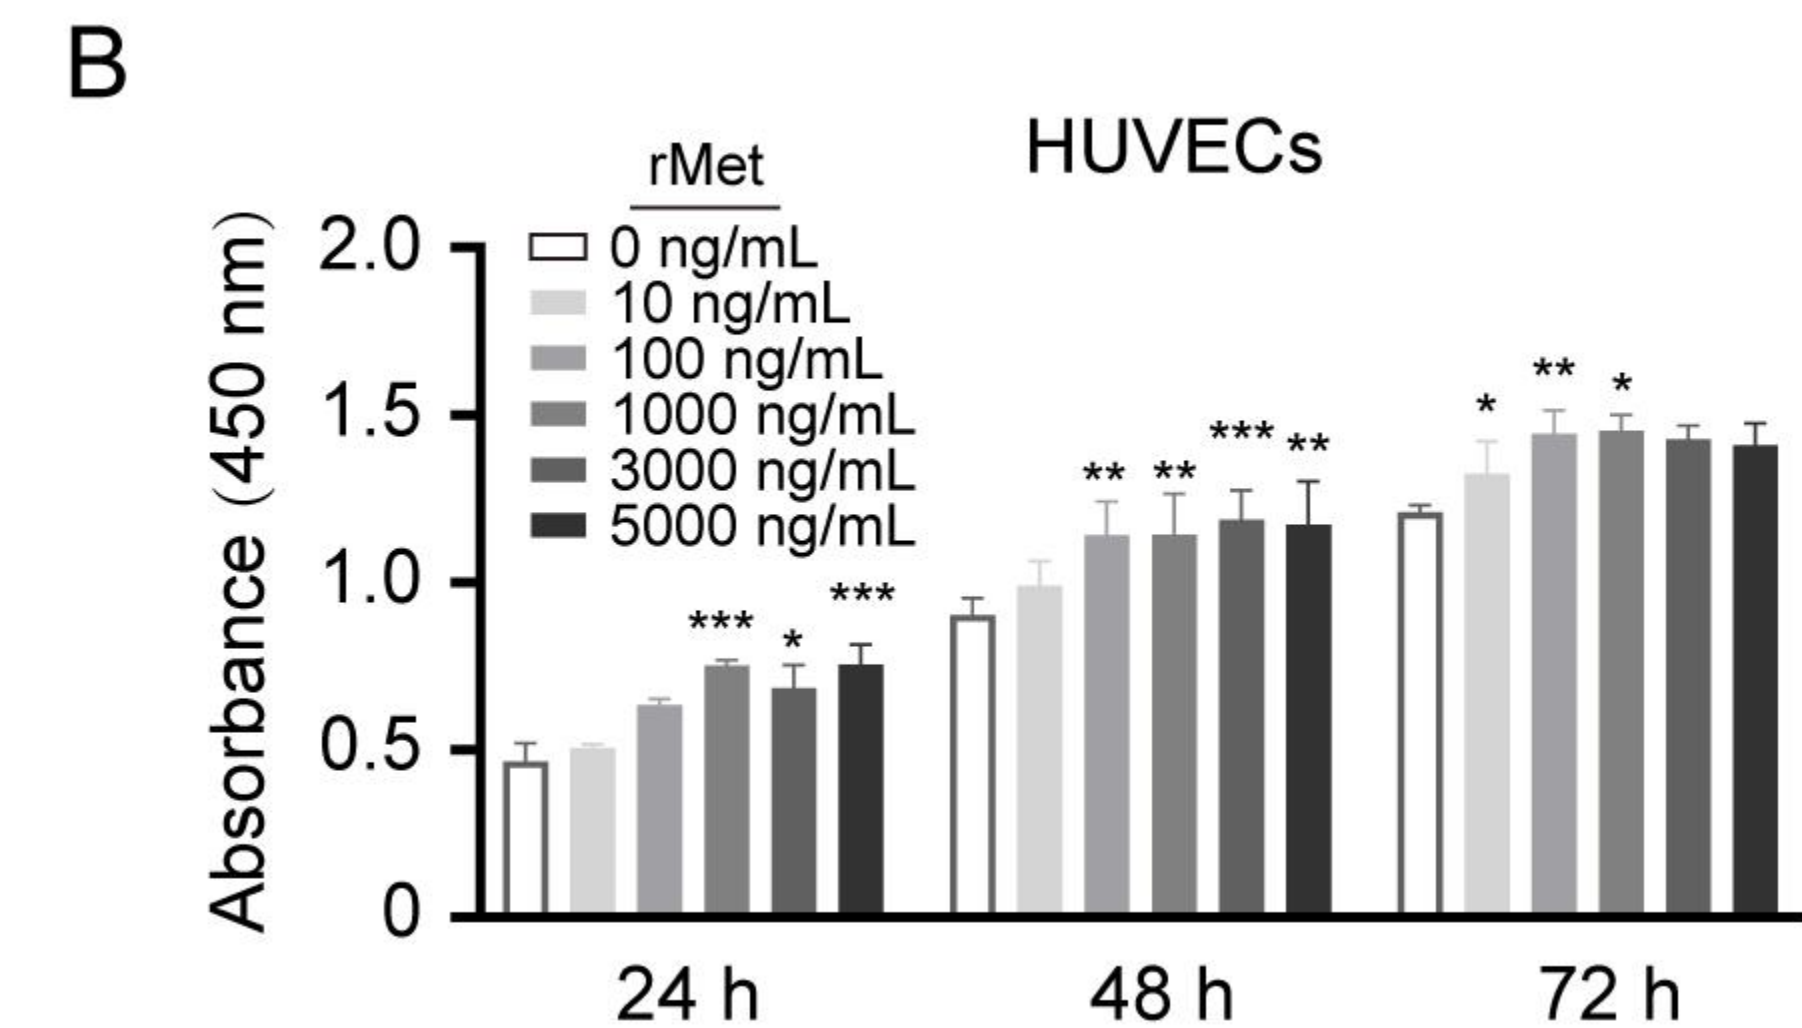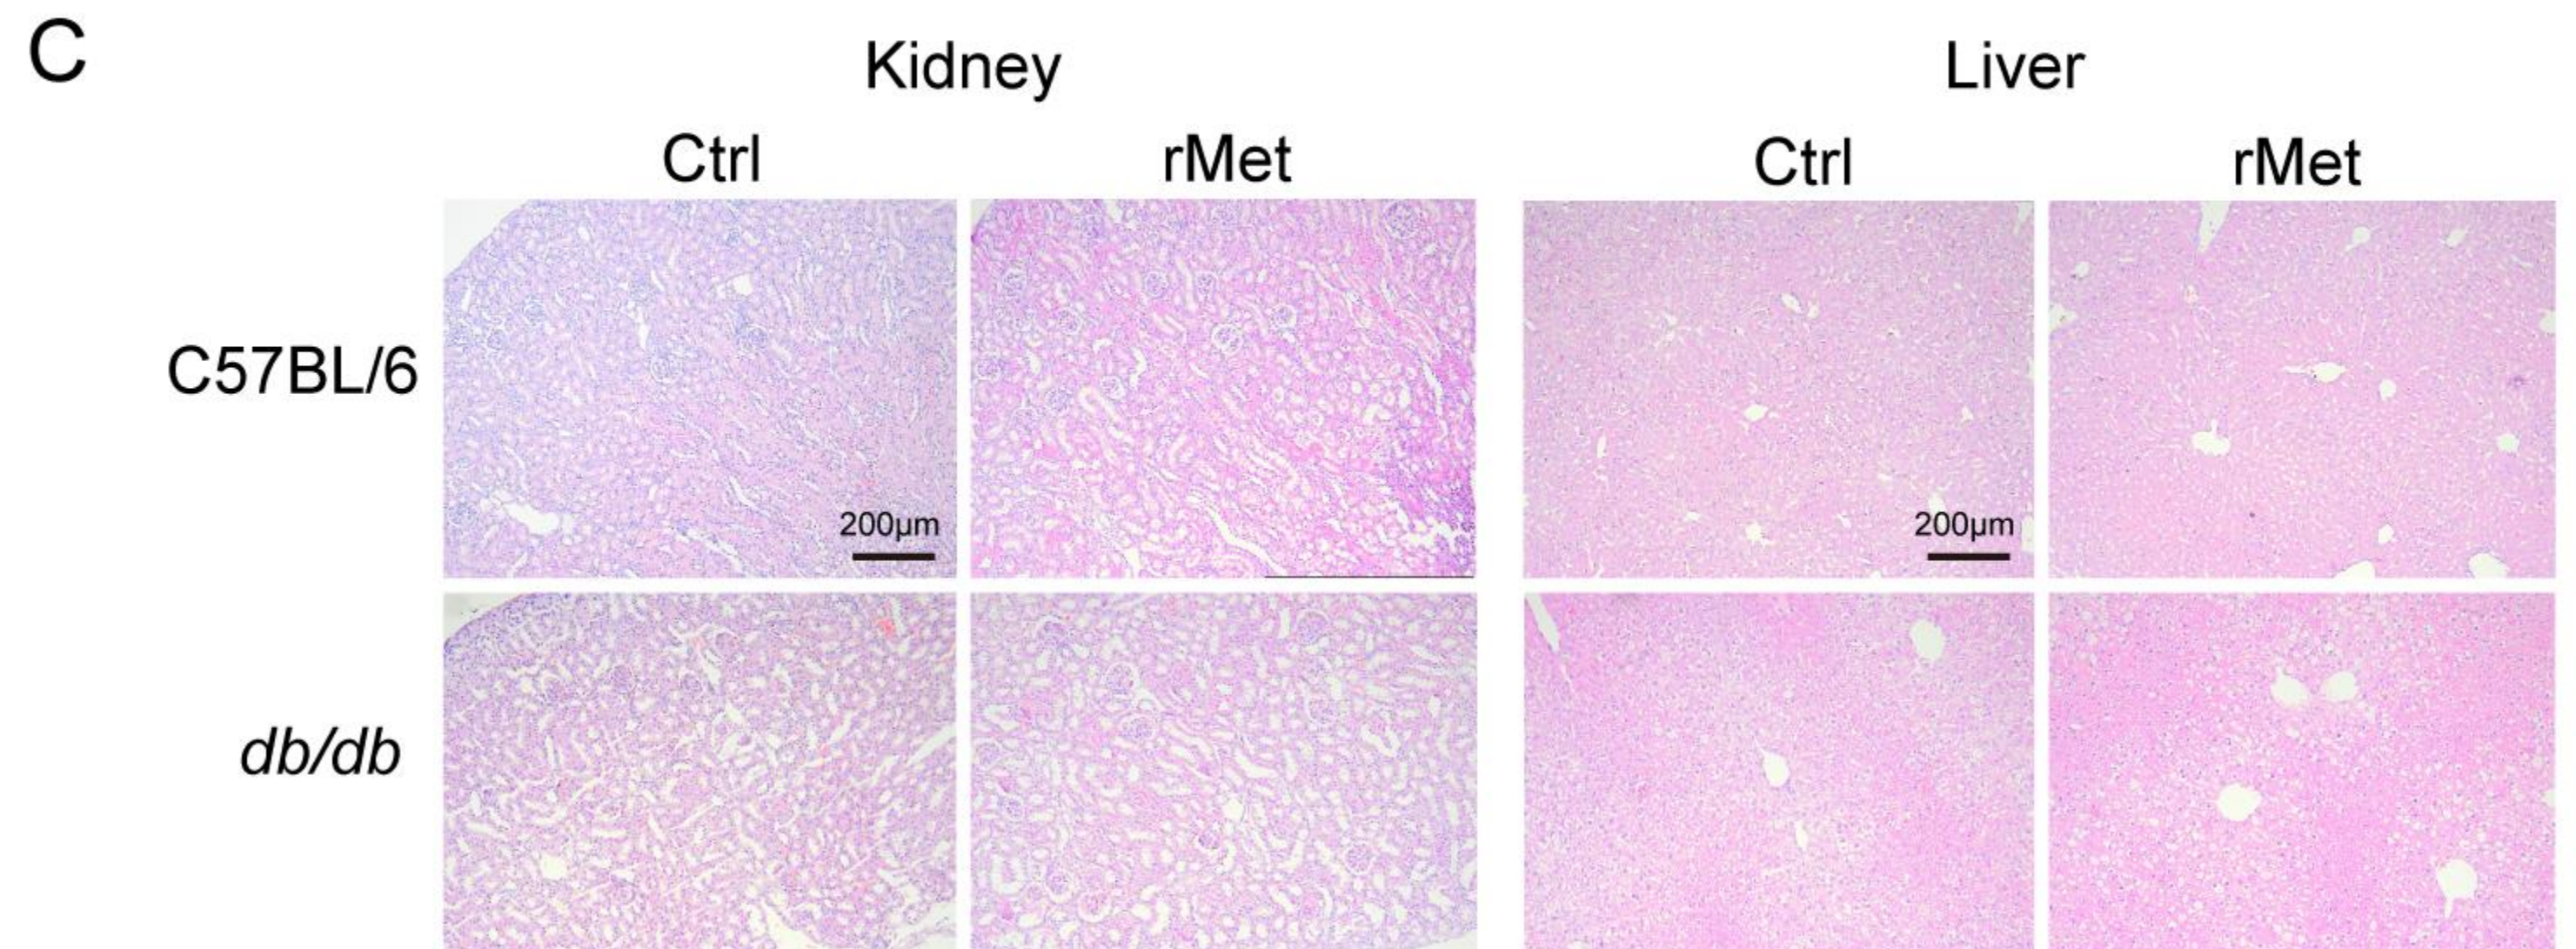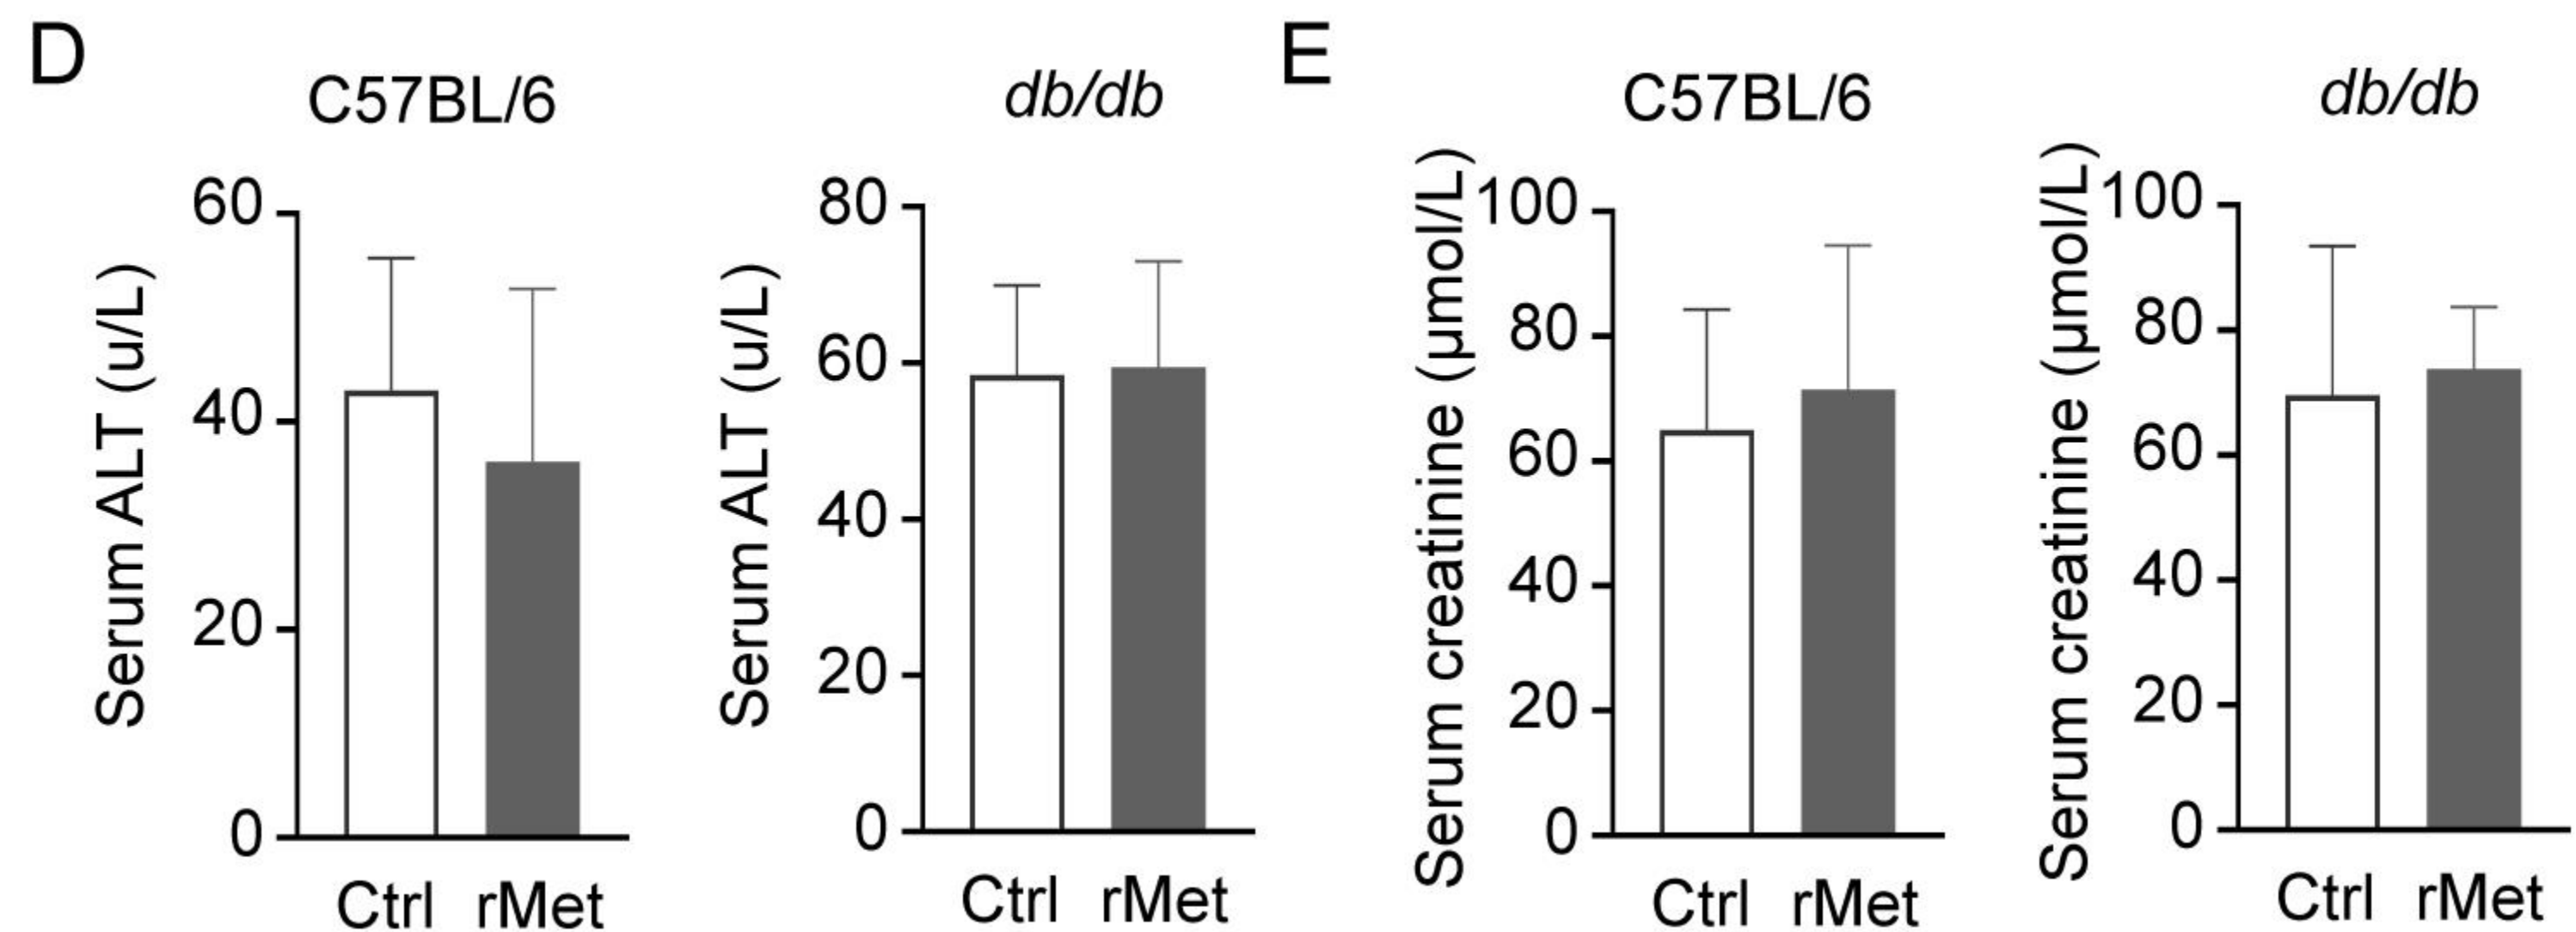



# Supplementary Fig. 6

A

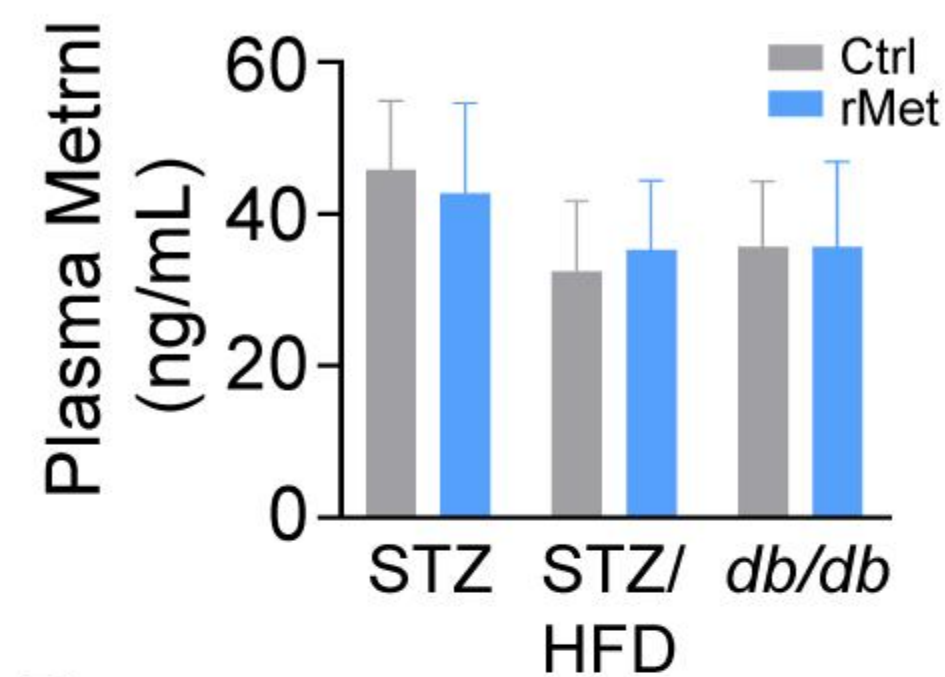

B

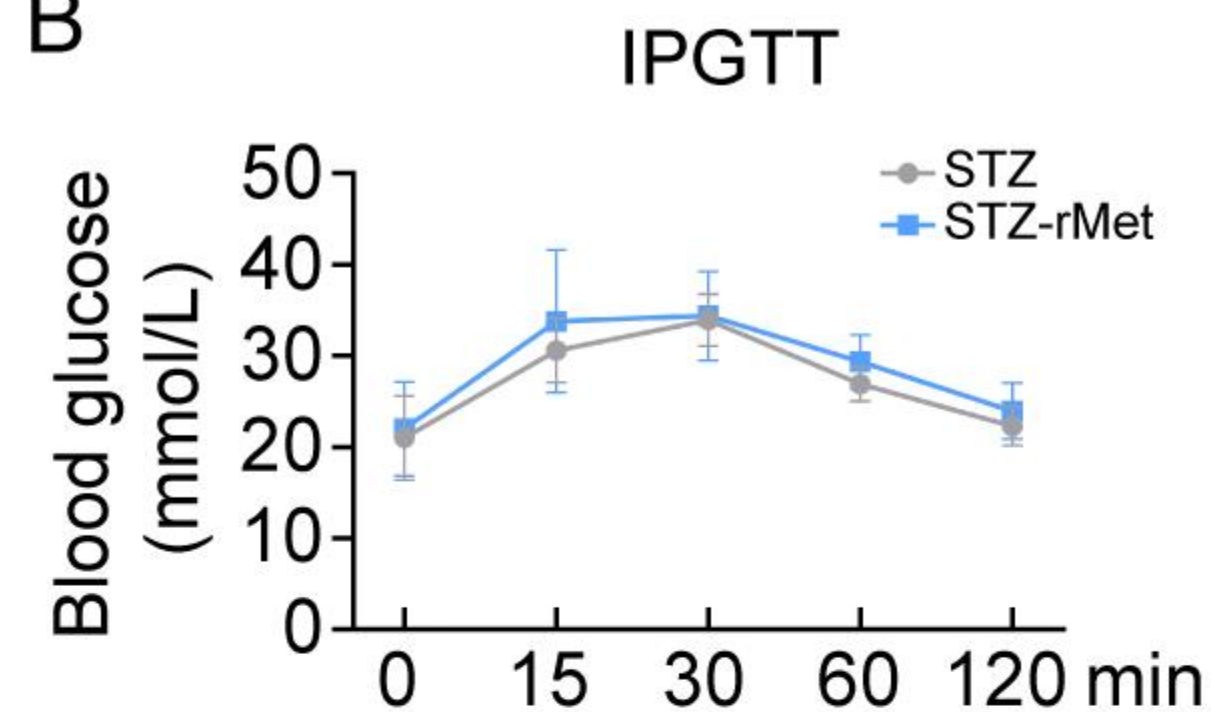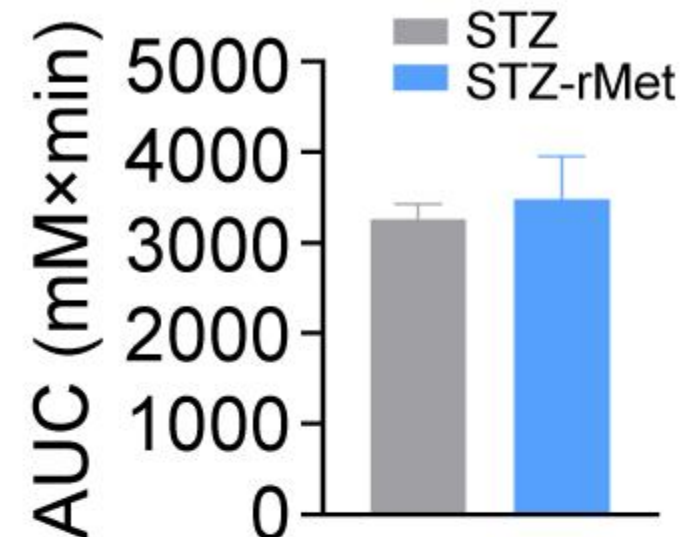

C

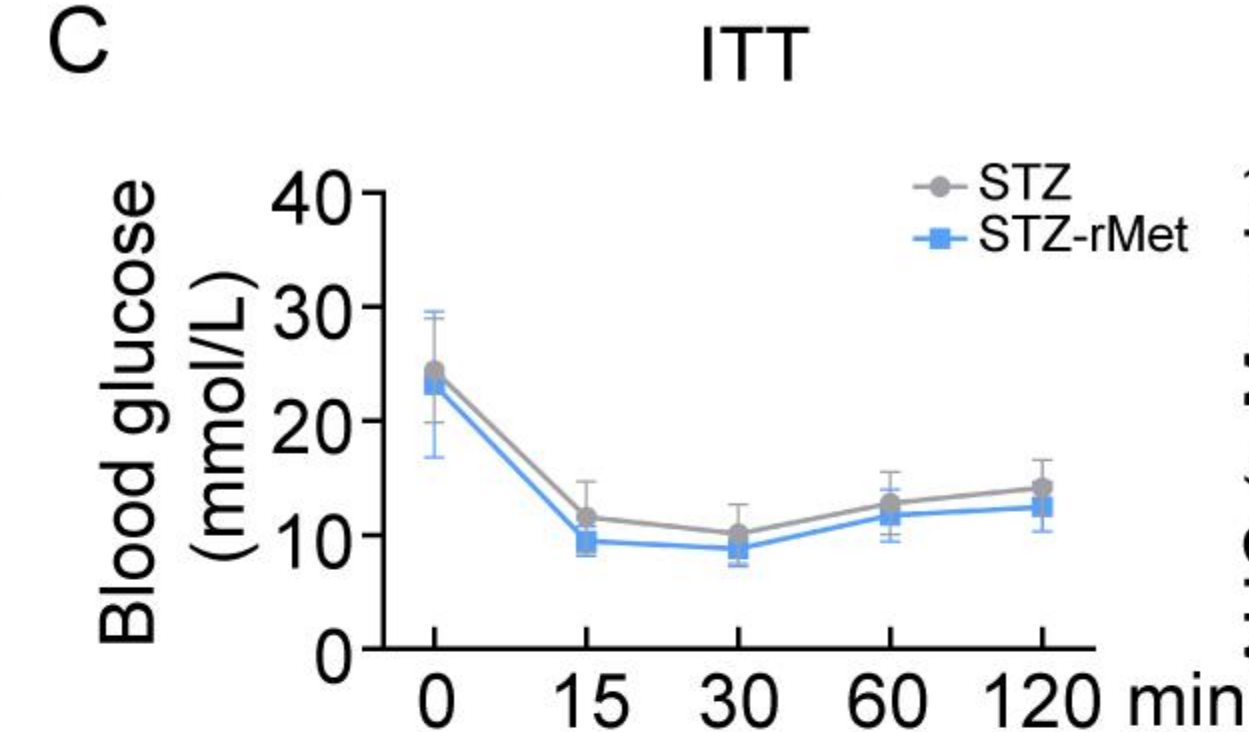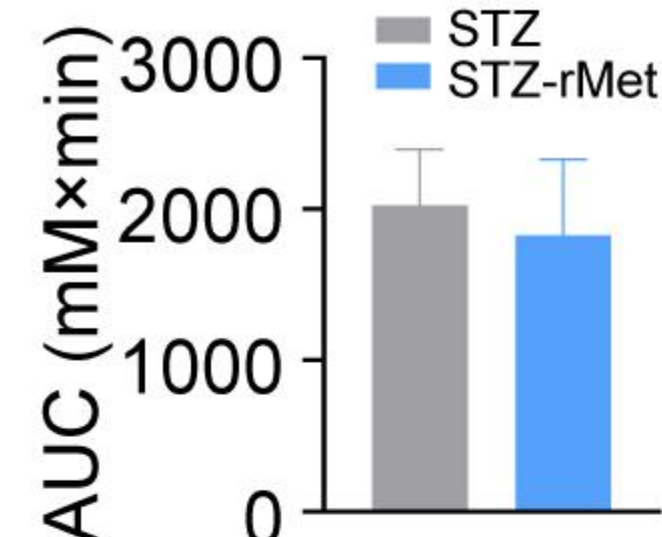

D

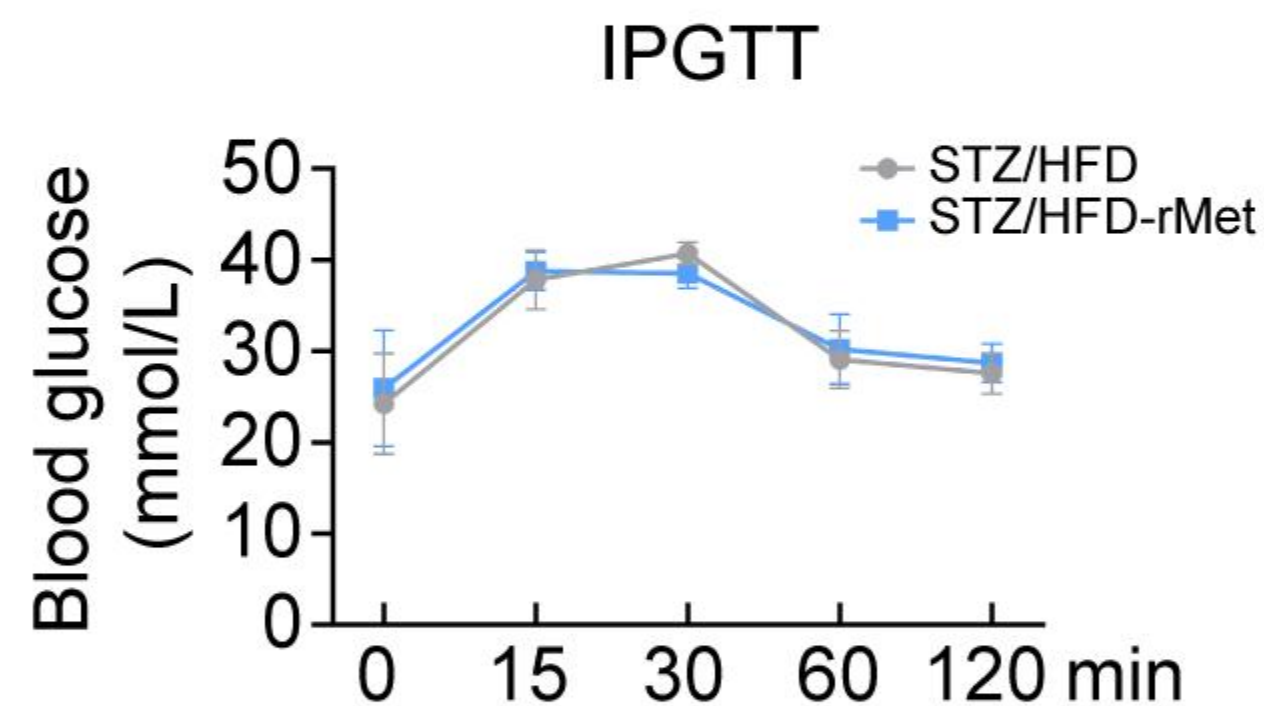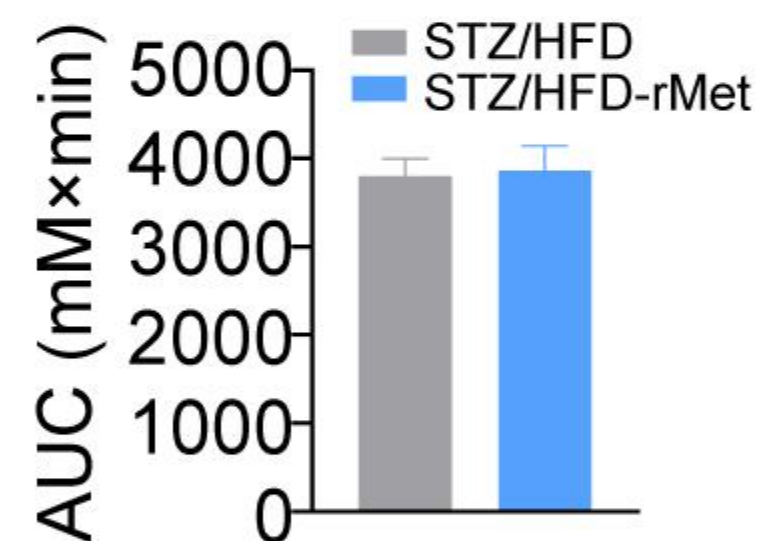

E

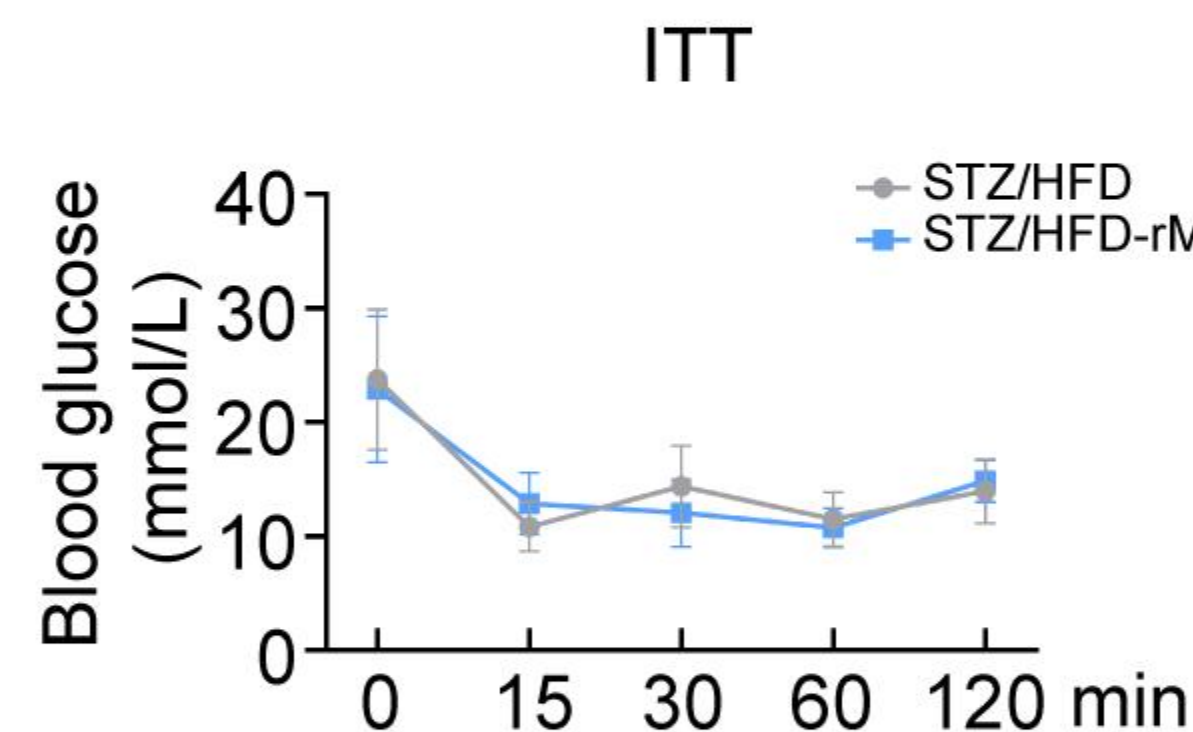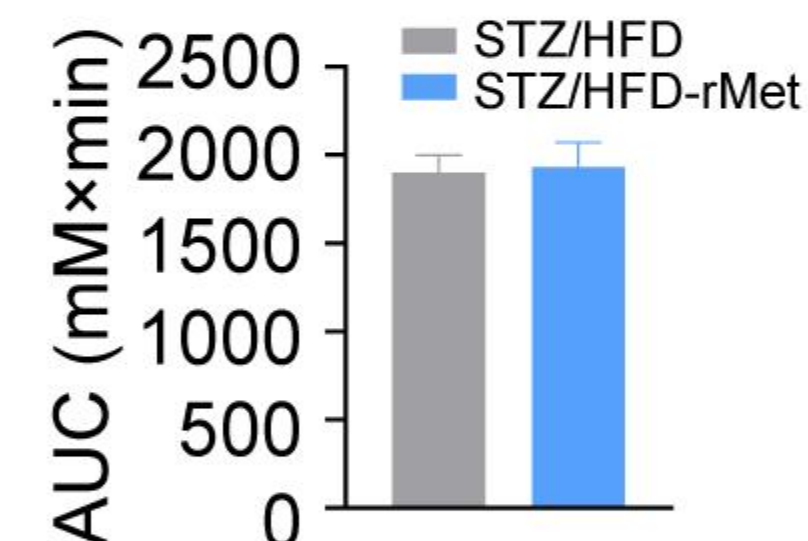

F

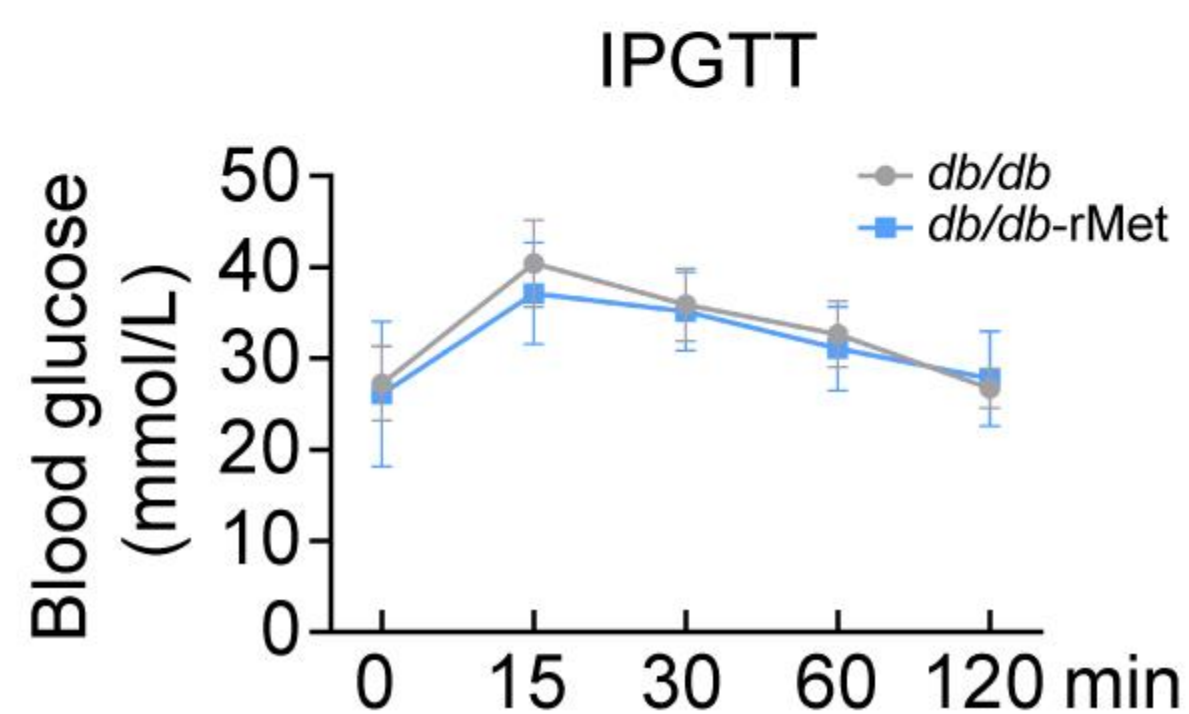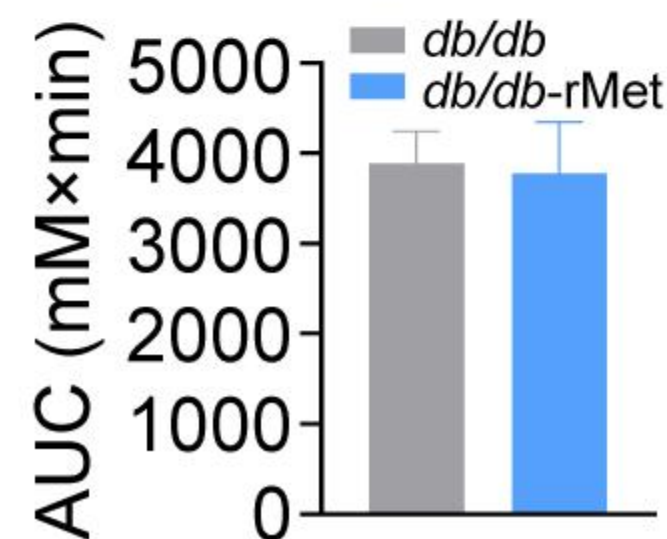

G

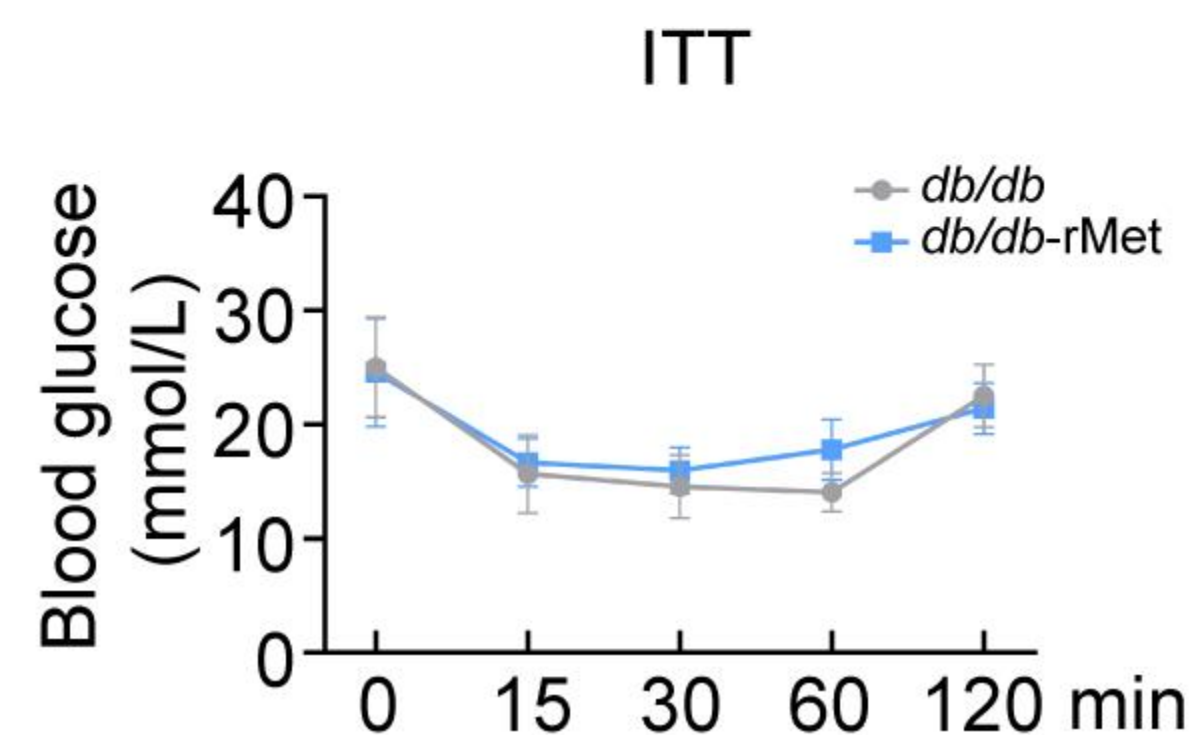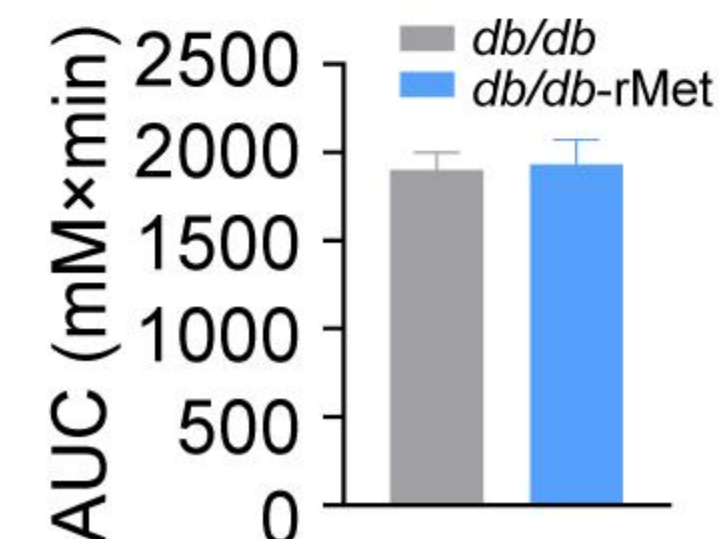

Supplement: Supplementary file 2 [file 1]
