# Supplementary material
Source: publisher figshare collection journal article supplement (https://diabetesjournals.figshare.com/articles/dataset/_/24018906)
Supplement: Supplementary file 3 [file 1]

**Supplementary Table 1. Clinical characteristics of T2DM patients with DFU. Related to Figure 1C.**

| Number           | Age            | Sex | Duration<br>(year) | SCr<br>( $\mu$ mol/L) | BUN<br>(mmol/ L) | FBG<br>(mmol/ L) | HbA1c<br>(%)     | CHO<br>(mmol/ L) | TG<br>(mmol/L) | HDL-C<br>(mmol/L) | LDL-C<br>(mmol/L) |
|------------------|----------------|-----|--------------------|-----------------------|------------------|------------------|------------------|------------------|----------------|-------------------|-------------------|
| NC-1             | 57             | M   | 5.6                | 46.6                  | 5.5              | 5.1              | NA               | 5.31             | 1.68           | 0.86              | 2.92              |
| NC-2             | 45             | M   | 5.4                | 68.2                  | 4.4              | 4.7              | NA               | 4.37             | 0.93           | 0.84              | 2.46              |
| NC-3             | 46             | M   | 3.3                | 68.9                  | 5.2              | 5.3              | NA               | 4.11             | 1.60           | 0.86              | 2.0               |
| NC-4             | 75             | F   | 7.6                | 58                    | 5.7              | 5.2              | NA               | 4.88             | 1.11           | 1.59              | 3.27              |
| NC-5             | 83             | F   | 4.5                | 83                    | 6.0              | 4.5              | NA               | 4.03             | 0.83           | 1.15              | 3.07              |
| NC-6             | 77             | M   | 10.2               | 75                    | 6.3              | 4.8              | 4.8              | 3.83             | 0.92           | 1.25              | 2.98              |
| NC-7             | 68             | M   | 7.7                | 80                    | 3.5              | 5.4              | 5.2              | 4.21             | 1.16           | 1.51              | 3.02              |
| mean $\pm$<br>SD | 64 $\pm$<br>15 | /   | 6.47 $\pm$ 2.45    | 68 $\pm$ 12.7         | 5.2 $\pm$ 0.9    | 5.0 $\pm$ 0.3    | 5.0 $\pm$<br>0.3 | 4.39 $\pm$ 0.5   | 1.18 $\pm$ 0.3 | 1.15 $\pm$ 0.3    | 2.82 $\pm$ 0.4    |
| Number           | (year)         | Sex | Duration<br>(year) | SCr<br>( $\mu$ mol/L) | BUN<br>(mmol/ L) | FBG<br>(mmol/ L) | HbA1c<br>(%)     | CHO<br>(mmol/ L) | TG<br>(mmol/L) | HDL-C<br>(mmol/L) | LDL-C<br>(mmol/L) |
| DFU-1            | 81             | F   | 14.2               | 53.2                  | 4.44             | 5.3              | 6.6              | 4.33             | 1.03           | 1.19              | 2.55              |
| DFU -2           | 49             | M   | 8.6                | 108.7                 | 10.25            | 8.8              | 7.8              | 3.37             | 1.68           | 0.86              | 2.03              |
| DFU -3           | 59             | F   | 5.9                | 61.3                  | 9.37             | 13.9             | 13.5             | 3.58             | 1.21           | 0.99              | 2.07              |
| DFU -4           | 57             | M   | 7.7                | 71.3                  | 3.16             | 11.4             | 9.8              | 4.25             | 3.56           | 1.0               | 2.17              |
| DFU -5           | 64             | M   | 8.5                | 61.6                  | 5.83             | 9.1              | 12.9             | 2.4              | 0.42           | 1.24              | 1.09              |
| DFU -6           | 61             | M   | 3.1                | 69.0                  | 5.97             | 17.1             | 11.1             | 3.29             | 1.32           | 0.6               | 2.18              |
| DFU -7           | 65             | M   | 4.6                | 202.7                 | 13.68            | 12.7             | 9.8              | 3.28             | 1.07           | 0.72              | 2.02              |
| DFU -8           | 65             | F   | 11.1               | 77.0                  | 5.4              | 15.6             | 13.4             | 2.81             | 1.19           | 0.71              | 1.69              |
| DFU -9           | 56             | M   | 3.4                | 64.7                  | 8.38             | 7.1              | 7.0              | 2.72             | 0.77           | 0.61              | 1.76              |
| DFU -10          | 72             | M   | 5.9                | 81.4                  | 4.65             | 11.2             | 10.7             | 4.05             | 1.28           | 0.78              | 2.71              |
| DFU -11          | 57             | M   | 9.3                | 82.5                  | 4.01             | 28.4             | 12.3             | 3.26             | 1.35           | 0.78              | 2.17              |

|              |             |   |               |                |            |            |               |            |            |            |            |
|--------------|-------------|---|---------------|----------------|------------|------------|---------------|------------|------------|------------|------------|
| mean ±<br>SD | 62 ±<br>8.6 | / | 7.48±<br>3.36 | 84.9 ±<br>41.8 | 6.83 ± 3.2 | 12.8 ± 6.3 | 10.4 ±<br>2.5 | 3.39 ± 0.6 | 1.35 ± 0.8 | 0.86 ± 0.2 | 2.04 ± 0.4 |
|--------------|-------------|---|---------------|----------------|------------|------------|---------------|------------|------------|------------|------------|

T2DM, type 2 diabetes; FBG, fasting blood glucose; SCr, serum creatinine; BUN, Blood urea nitrogen; CHO, total cholesterol; TG, triglyceride; LDL-C, low density lipoprotein cholesterol; HDL-C, high density lipoprotein cholesterol; HbA1c, hemoglobin A1c; NA, not applicable/not available; F, female; M, male; DFU, diabetic foot ulcer. Data are expressed as mean ± SD.

**Supplementary Table 2. Clinical characteristics of healthy control (Control), T2DM and T2DM with DFU. Related to Supplementary Figure 1B.**

| Number           | (year)           | Sex | Duration<br>(year) | SCr<br>( $\mu$ mol/L) | BUN<br>(mmol/ L) | FBG<br>(mmol/ L) | HbA1c<br>(%)   | CHO<br>(mmol/ L) | TG<br>(mmol/L) | HDL-C<br>(mmol/L) | LDL-C<br>(mmol/L) |
|------------------|------------------|-----|--------------------|-----------------------|------------------|------------------|----------------|------------------|----------------|-------------------|-------------------|
| Control-1        | 49               | F   | 0                  | 63.6                  | 3.9              | 5.1              | 5.6            | 4.62             | 20.6           | 0.82              | 2.58              |
| Control-2        | 45               | M   | 0                  | 68.2                  | 4.4              | 4.7              | 5.3            | 4.37             | 0.93           | 0.84              | 2.46              |
| Control-3        | 54               | F   | 0                  | 54.8                  | 4.2              | 4.9              | 4.9            | 3.7              | 1.42           | 2.01              | 2.74              |
| Control-4        | 46               | F   | 0                  | 78.3                  | 7.2              | 6                | 5.8            | 4.32             | 1.66           | 1.84              | 3.09              |
| Control-5        | 64               | M   | 0                  | 65.4                  | 5.8              | 5.7              | 5.4            | 4.56             | 0.92           | 1.95              | 3.29              |
| Control-6        | 51               | M   | 0                  | 55.3                  | 6.1              | 5.1              | 4.4            | 4.72             | 0.73           | 1.62              | 2.5               |
| Control-7        | 52               | F   | 0                  | 60.5                  | 6.8              | 5.3              | 5.3            | 4.35             | 1.3            | 1.51              | 3.18              |
| Control-8        | 49               | M   | 0                  | 63.5                  | 6                | 4.2              | 4.6            | 3.5              | 0.88           | 1.07              | 3.23              |
| Control-9        | 46               | F   | 0                  | 76                    | 4.3              | 4.7              | 4.8            | 4.71             | 1.62           | 1.68              | 1.6               |
| Control-10       | 54               | M   | 0                  | 47.9                  | 6.8              | 4.3              | 5.3            | 5.12             | 0.98           | 1.35              | 3.21              |
| mean $\pm$<br>SD | 51 $\pm$ 5.<br>6 | /   | 0                  | 63 $\pm$ 9.4          | 5.55 $\pm$ 1.2   | 5 $\pm$ 0.6      | 5.14 $\pm$ 0.5 | 4.4 $\pm$ 0.5    | 3.1 $\pm$ 6.2  | 1.47 $\pm$ 0.4    | 2.79 $\pm$ 0.5    |
| Number           | (year)           | Sex | Duration<br>(year) | SCr<br>( $\mu$ mol/L) | BUN<br>(mmol/ L) | FBG<br>(mmol/ L) | HbA1c<br>(%)   | CHO<br>(mmol/ L) | TG<br>(mmol/L) | HDL-C<br>(mmol/L) | LDL-C<br>(mmol/L) |
| T2DM-1           | 76               | F   | 5.3                | 43.1                  | 3.64             | 7.8              | 7              | 4.21             | 2.1            | 1.09              | 2.5               |
| T2DM-2           | 62               | F   | 10.2               | 84.7                  | 7.16             | 9.5              | 8.6            | 4.25             | 2.82           | 0.79              | 2.67              |
| T2DM-3           | 54               | M   | 10.7               | 184.9                 | 9.51             | 9.7              | 8.5            | 5.94             | 1.99           | 1.1               | 3.73              |
| T2DM-4           | 57               | M   | 17.1               | 168.4                 | 8.29             | 13.5             | 16.3           | 7.78             | 1.65           | 1.93              | 4.36              |
| T2DM-5           | 58               | M   | 10.2               | 64.9                  | 8.55             | 8                | 10.1           | 4.86             | 2.56           | 1.15              | 2.77              |
| T2DM-6           | 65               | F   | 3.6                | 51.6                  | 7.06             | 7                | 7.5            | 6.96             | 1.48           | 1.56              | 4.23              |
| T2DM-7           | 61               | M   | 10.4               | 64.9                  | 5.13             | 11.7             | 14.2           | 3.87             | 3.88           | 1.07              | 1.68              |

|           |           |     |                 |              |               |               |           |               |             |                |                |
|-----------|-----------|-----|-----------------|--------------|---------------|---------------|-----------|---------------|-------------|----------------|----------------|
| T2DM-8    | 14        | F   | 0.1             | 55.6         | 2.87          | 13.2          | 16        | 5             | 1.28        | 0.94           | 3.17           |
| T2DM-9    | 60        | F   | 20.5            | 178.5        | 14.23         | 4.5           | 6.2       | 4.96          | 2.86        | 1.11           | 3.05           |
| T2DM-10   | 50        | F   | 17.2            | 64.6         | 7.4           | 6.6           | 10.3      | 6.72          | 2.8         | 1.59           | 4.09           |
| mean ± SD | 55.7±16.2 | /   | 10.5±6.4        | 96.12±57.2   | 7.38±3.2      | 9.15±3        | 10.47±3.7 | 5.26±1.3      | 2.3±0.8     | 1.23±0.3       | 3.22±0.9       |
| Number    | (year)    | Sex | Duration (year) | SCr (μmol/L) | BUN (mmol/ L) | FBG (mmol/ L) | HbA1c (%) | CHO (mmol/ L) | TG (mmol/L) | HDL-C (mmol/L) | LDL-C (mmol/L) |
| DFU-1     | 60        | M   | 10.7            | 137.1        | 6.97          | 10.7          | 8         | 5.2           | 1.84        | 2.02           | 2.87           |
| DFU-2     | 71        | M   | 20.1            | 78.2         | 5.83          | 7.3           | 9.9       | 4.09          | 1.52        | 0.94           | 2.64           |
| DFU-3     | 65        | F   | 10.7            | 77           | 5.4           | 15.6          | 13.4      | 2.81          | 1.19        | 0.71           | 1.69           |
| DFU-4     | 59        | F   | 9.3             | 61.3         | 9.37          | 13.9          | 13.5      | 3.58          | 1.21        | 0.99           | 2.07           |
| DFU-5     | 49        | M   | 10.8            | 108.7        | 10.25         | 8.8           | 7.8       | 3.37          | 1.68        | 0.86           | 2.03           |
| DFU-6     | 81        | F   | 10.5            | 67.9         | 6.32          | 5.1           | 6.6       | 4.73          | 1.01        | 1.08           | 3.03           |
| DFU-7     | 48        | M   | 6.3             | 75           | 6.61          | 7.7           | 9.4       | 4.75          | 0.99        | 1.27           | 2.57           |
| DFU-8     | 53        | M   | 5.8             | 62.8         | 4.48          | 5.2           | 8         | 2.32          | 0.93        | 0.6            | 1.13           |
| DFU-9     | 48        | M   | 1.5             | 172.1        | 17.81         | 7             | 12        | 4.94          | 0.98        | 1              | 3.42           |
| DFU-10    | 61        | M   | 10.6            | 129.8        | 11.83         | 6             | 10.5      | 3.92          | 0.87        | 1.33           | 2.27           |
| DFU-11    | 66        | M   | 10.2            | 64.1         | 6.13          | 5.2           | 7.8       | 4.12          | 0.79        | 1.05           | 2.17           |
| DFU-12    | 73        | F   | 30.3            | 67.8         | 5.32          | 4.8           | 8         | 3.26          | 0.74        | 1.48           | 1.41           |
| DFU-13    | 81        | F   | 8.5             | 53.2         | 4.44          | 5.3           | 6.6       | 4.33          | 1.03        | 1.19           | 2.55           |
| DFU-14    | 59        | F   | 9.8             | 61.3         | 9.37          | 13.9          | 13.5      | 3.58          | 1.21        | 0.99           | 2.07           |
| mean ± SD | 62±11.1   | /   | 11±6.8          | 86.88±35.8   | 7.87±3.6      | 8.32±3.73     | 9.64±2.5  | 3.93±0.8      | 1.14±0.3    | 1.11±0.4       | 2.28±0.6       |

**Supplementary Table 3. Primers for real-time qPCR**

| <b>Gene</b>       | <b>Forward (5' to 3')</b> | <b>Reverse (5' to 3')</b>    |
|-------------------|---------------------------|------------------------------|
| <i>Mus Metrnl</i> | GGAATTCCTCTTCACTGGACAT    | CTTCTGCTTTCCTGTACATCCT       |
| <i>Mus Gapdh</i>  | AGGTCGGTGTGAACGGATTTG     | TGTAGACCATGTAGTTGAGGTCA      |
| <i>Mus CD31</i>   | AGCCAGCAGTATGAGGACCAGTC   | TCCAATGACAACCACCGCAATGA<br>G |
| <i>Mus VEGF</i>   | AGGCTGCTGTAACGATGAAG      | TTCCTATGTGCTGGCTTTG          |
| <i>Mus CD206</i>  | TGATTACGAGCAGTGGAAGC      | GTTCAACCGTAAGCCCAATTT        |
| <i>Mus Arg1</i>   | AGACCACAGTCTGGCAGTTG      | CCACCCAAATGACACATAGG         |
